# Supplementary material for: Revealing of Intracellular Antioxidants in Dendrobium nobile by High Performance Liquid Chromatography-Tandem Mass Spectrometry
Source: MDPI journal article supplement (doi:10.3390/metabo13060702), 2023-05-28
Supplement: s1 [file s1]

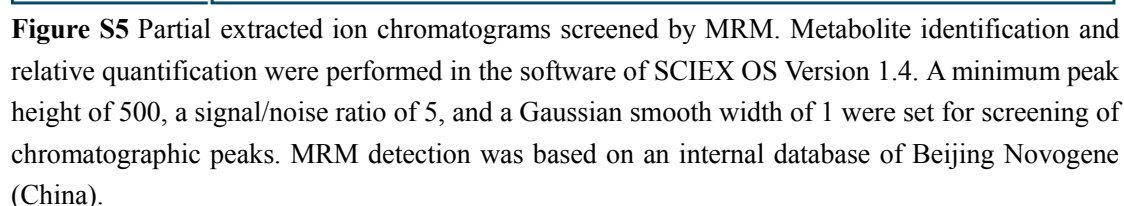

**Figure S5** Partial extracted ion chromatograms screened by MRM. Metabolite identification and relative quantification were performed in the software of SCIEX OS Version 1.4. A minimum peak height of 500, a signal/noise ratio of 5, and a Gaussian smooth width of 1 were set for screening of chromatographic peaks. MRM detection was based on an internal database of Beijing Novogene (China).
