# Supplementary material for: Revealing of Intracellular Antioxidants in Dendrobium nobile by High Performance Liquid Chromatography-Tandem Mass Spectrometry
Source: MDPI journal article supplement (doi:10.3390/metabo13060702), 2023-05-28
Supplement: s1 [file s1]

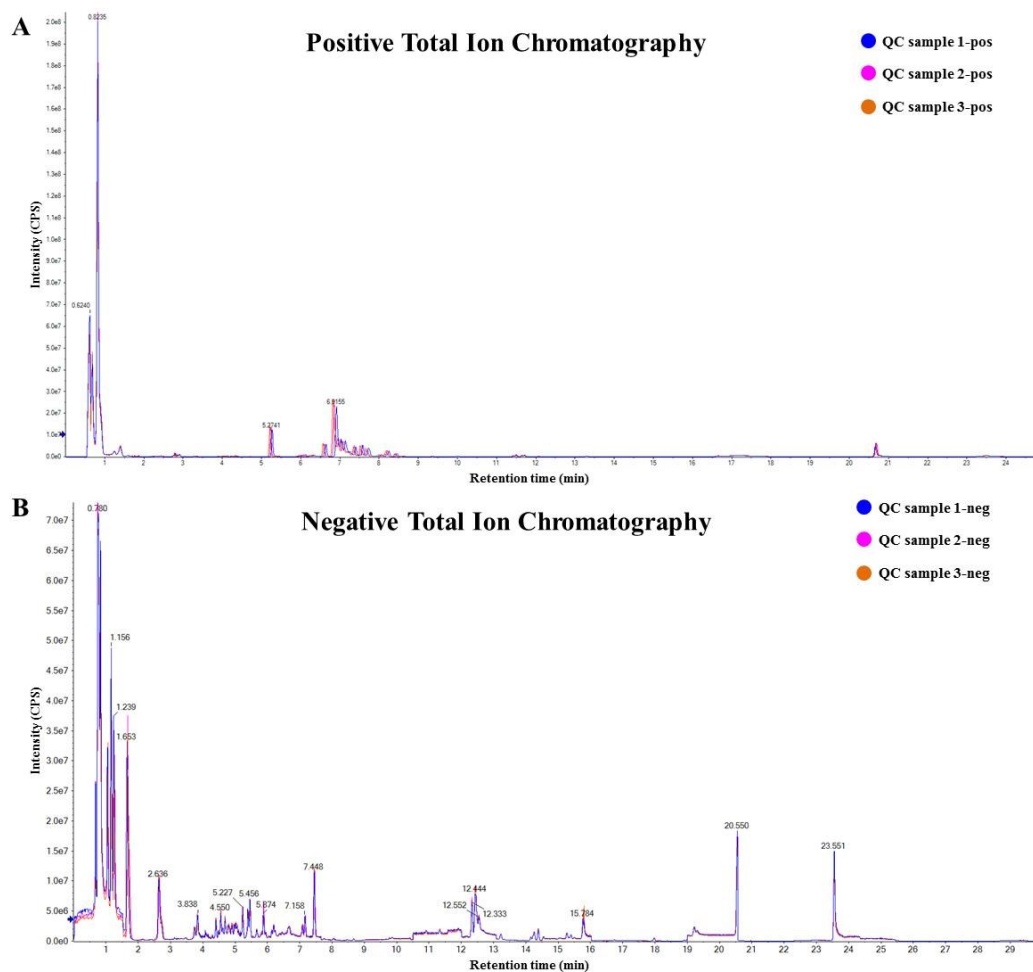

**Figure S4** HPLC-MS/MS total ion chromatograms of QC samples. A Positive ion mode. B Negative ion mode. The QC sample is a mixed sample of root, stem, leaf, flower, and fruit in this study, which is used to evaluate the stability and reliability of HPLC-MS/MS.
