# Supplementary material for: Revealing of Intracellular Antioxidants in Dendrobium nobile by High Performance Liquid Chromatography-Tandem Mass Spectrometry
Source: MDPI journal article supplement (doi:10.3390/metabo13060702), 2023-05-28
Supplement: s1 [file s1]

**Table S1** Detailed information of 657 metabolites identified by HPLC-MS/MS in *D. nobile*<sup>1</sup>

| Compound ID | Name                                                                                                                                                                                  | Formula      | MW (Da) | RT (min) | Q1 (m/z) | Class                            | Peak areas |           |           |           |           |           |           |           |           |
|-------------|---------------------------------------------------------------------------------------------------------------------------------------------------------------------------------------|--------------|---------|----------|----------|----------------------------------|------------|-----------|-----------|-----------|-----------|-----------|-----------|-----------|-----------|
|             |                                                                                                                                                                                       |              |         |          |          |                                  | Flower1    | Flower2   | Flower3   | Fruit1    | Fruit2    | Fruit3    | QC1       | QC2       | QC3       |
| Com_39_neg  | (-)-Epigallocatechin gallate                                                                                                                                                          | C22H18O11    | 458.37  | 5.77     | 457.08   | Organic Acid And Its Derivatives | 29,364     | 18,881    | 14,263    | 32,380    | 25,980    | 27,680    | 10,250    | 11,430    | 11,700    |
| Com_563_pos | (-)-Maackiain                                                                                                                                                                         | C16H12O5     | 284.26  | 0.60     | 285.08   | Phenols                          | 79,010     | 10,660    | 18,460    | 64,820    | 50,360    | 58,730    | 44,350    | 26,620    | 31,700    |
| Com_407_pos | (-)-N-[3',4'-Dihydroxy-(E)-cinnamoyl]-L-glutamic acid                                                                                                                                 | C14H15N1O7   | 309.27  | 19.23    | 310.00   | Amino Acid And Its Derivatives   | 158,100    | 155,700   | 181,800   | 140,600   | 126,500   | 167,700   | 148,800   | 155,500   | 145,000   |
| Com_403_pos | (-)-Norepinephrine 11-ketone                                                                                                                                                          | C14H21NO8    | 331.32  | 0.77     | 332.13   | Others                           | 2,726,000  | 1,667,000 | 1,227,000 | 5,851,000 | 5,425,000 | 5,240,000 | 2,021,000 | 2,175,000 | 2,101,000 |
| Com_580_pos | (-)-Pinoresinol                                                                                                                                                                       | C20H22O6     | 358.39  | 8.83     | 352.11   | Phenols                          | 103,905    | 27,990    | 37,750    | 121,200   | 105,000   | 110,000   | 36,010    | 50,170    | 46,090    |
| Com_3_neg   | (+)-Arabinose                                                                                                                                                                         | C5H10O5      | 150.13  | 0.71     | 158.25   | Carbohydrates                    | 2,793      | 3,587     | 3,583     | 14,360    | 21,920    | 25,150    | 8,359     | 7,567     | 4,381     |
| Com_404_pos | (+)-Baclofen                                                                                                                                                                          | C10H12ClNO2  | 213.66  | 9.53     | 214.20   | Others                           | 423,600    | 471,000   | 524,300   | 400,000   | 424,300   | 440,300   | 358,800   | 443,200   | 450,500   |
| Com_356_pos | (+)-pinoresinol 4'-O-β-D-glucopyranoside                                                                                                                                              | C26H32O11NH3 | 520.53  | 6.30     | 538.23   | Phenols                          | 43,910     | 12,910    | 1,905     | 47,980    | 62,990    | 60,990    | 20,780    | 24,040    | 25,540    |
| Com_401_pos | (+)-Tetrandrine (2S,3R)-2-[[[9-[(2R,3R,4S,5R)-3,4-Dihydroxy-5-(hydroxymethyl)tetrahydro-2-furanyl]-9H-purin-6-yl](methyl)carbamoyl]amino]-3-hydroxybutanoic acid (non-preferred name) | C38H42N2O6   | 622.75  | 5.53     | 623.31   | Alkaloids                        | 61,620     | 19,400    | 5,605     | 248,800   | 284,100   | 248,500   | 46,490    | 110,500   | 123,100   |
| Com_575_pos | (3,4-Dimethoxyphenyl) Acetic Acid                                                                                                                                                     | C16H22N6O8   | 426.38  | 4.06     | 427.16   | Nucleotide And Its Derivates     | 113,300    | 76,650    | 64,330    | 24,200    | 22,620    | 22,820    | 20,060    | 29,780    | 32,350    |
| Com_574_pos | (S)-(+)-2-(anilinomethyl)pyrrolidine                                                                                                                                                  | C10H12O4     | 196.20  | 3.76     | 197.10   | Organic Acid And Its Derivatives | 61,900     | 19,380    | 10,440    | 261,200   | 267,800   | 249,100   | 85,150    | 102,800   | 105,900   |
| Com_572_pos | 1,4,5,6,7,8-Hexamethoxyanthrone                                                                                                                                                       | C11H16N2     | 176.26  | 4.06     | 177.30   | Amino Acid And Its Derivatives   | 176,000    | 70,100    | 179,100   | 21,840    | 18,410    | 12,690    | 20,370    | 35,600    | 33,440    |
| Com_678_pos | 1,3-Dimethyluric Acid                                                                                                                                                                 | C18H18O7     | 346.33  | 29.34    | 347.11   | Others                           | 3,474      | 3,582     | 3,592     | 3,665     | 4,501     | 3,913     | 2,583     | 5,914     | 2,353     |
| Com_502_pos | 1,5-Anhydro-D-glucitol                                                                                                                                                                | C7H8N4O3     | 196.16  | 7.09     | 197.00   | Organic Acid And Its Derivatives | 213,173    | 124,218   | 78,582    | 18,180    | 26,290    | 29,630    | 73,090    | 68,010    | 53,730    |
| Com_5_neg   | 1,6-Anhydro-β-D-Glucopyranose                                                                                                                                                         | C6H12O5      | 164.07  | 0.73     | 163.20   | Carbohydrates                    | 321,200    | 128,700   | 139,900   | 400,700   | 434,400   | 452,200   | 239,300   | 233,200   | 203,100   |
| Com_2_neg   | 10-Formyl-THF                                                                                                                                                                         | C6H10O5      | 162.14  | 0.73     | 161.05   | Carbohydrates                    | 912,000    | 593,100   | 1,727,000 | 533,100   | 540,200   | 541,000   | 552,500   | 443,000   | 573,800   |
| Com_503_pos | 12OHJA-Ile-1                                                                                                                                                                          | C20H23N7O7   | 473.44  | 2.02     | 474.20   | Organic Acid And Its Derivatives | 214,000    | 29,980    | 64,790    | 227,100   | 209,100   | 215,500   | 60,530    | 79,080    | 87,770    |
| Com_306_neg | 14,15-Denhydrocrepenynic                                                                                                                                                              |              |         | 8.79     | 338.00   | Organic Acid And Its Derivatives | 3,883      | 767       | 1,982     | 23,030    | 22,020    | 23,840    | 28,640    | 21,700    | 19,990    |
| Com_504_pos | 16-Hydroxy-nexadecanoic                                                                                                                                                               | C18H28O2     | 276.41  | 14.12    | 277.22   | Lipids                           | 1,436,000  | 642,900   | 166,500   | 1,617,000 | 1,604,000 | 1,759,000 | 1,638,000 | 1,825,000 | 1,833,000 |
| Com_391_pos | 18-Nor-4,15-dihydroxyabieta-8,11,13-trien-7-one                                                                                                                                       | C32H62O5     | 526.83  | 10.16    | 529.20   | Lipids                           | 4,985      | 9,887     | 7,311     | 7,961     | 6,823     | 7,833     | 10,180    | 10,260    | 6,209     |
| Com_390_pos |                                                                                                                                                                                       | C19H26O3     | 302.41  | 6.52     | 303.20   | Terpenoids                       | 67,030     | 36,510    | 25,110    | 44,570    | 40,460    | 57,010    | 30,620    | 18,580    | 26,960    |

|             |                                                |               |        |       |        |                                  |           |           |           |           |           |           |           |           |           |
|-------------|------------------------------------------------|---------------|--------|-------|--------|----------------------------------|-----------|-----------|-----------|-----------|-----------|-----------|-----------|-----------|-----------|
| Com_393_pos | L-<br>Aminocyclopentanecarboxylic acid         | C6H11NO2      | 129.16 | 0.84  | 130.10 | Amino Acid And Its Derivatives   | 572,200   | 1,117,000 | 1,292,000 | 185,200   | 148,000   | 150,600   | 486,000   | 502,800   | 495,600   |
| Com_650_pos | L-<br>Aminocyclopropanecarboxylic acid         | C4H7NO2       | 101.10 | 0.69  | 102.10 | Amino Acid And Its Derivatives   | 1,656,000 | 3,521,000 | 4,536,000 | 696,500   | 712,700   | 703,400   | 1,730,000 | 1,618,000 | 1,582,000 |
| Com_366_pos | 1-Deoxynojirimycin                             | C6H13NO4      | 163.17 | 0.81  | 164.09 | Alkaloids                        | 62,240    | 7,062     | 12,440    | 30,340    | 36,850    | 34,910    | 28,980    | 31,400    | 27,020    |
| Com_389_pos | 1-Linoleoyl-Rac-Glycerol                       | C21H38O4      | 354.52 | 16.67 | 355.28 | Lipids                           | 10,050    | 15,510    | 13,010    | 27,070    | 30,800    | 34,360    | 5,704     | 5,531     | 4,930     |
| Com_388_pos | 1-Methyladenine                                | C6H7N5        | 149.15 | 0.82  | 150.00 | Nucleotide And Its Derivates     | 321,600   | 59,770    | 56,430    | 43,000    | 43,540    | 44,150    | 72,030    | 69,410    | 54,740    |
| Com_323_pos | 1-Methyladenosine                              | C11H15N5O4    | 281.27 | 1.16  | 282.10 | Nucleotide And Its Derivates     | 327,800   | 56,020    | 33,240    | 103,600   | 88,080    | 72,330    | 90,570    | 64,830    | 61,090    |
| Com_324_pos | 1-Methylhistidine                              | C7H11N3O2     | 169.18 | 1.10  | 170.10 | Amino Acid And Its Derivatives   | 378,400   | 403,600   | 247,600   | 464,900   | 351,400   | 482,700   | 217,000   | 214,300   | 208,800   |
| Com_307_neg | 1-Methyluric acid                              | C6H6N4O3      | 182.14 | 1.09  | 181.00 | Organic Acid And Its Derivatives | 43,860    | 9,470     | 8,628     | 28,070    | 30,050    | 41,930    | 26,000    | 20,510    | 29,510    |
| Com_308_neg | 1-O-b-D-glucopyranosyl sinapate                | C17H22O10     | 386.35 | 6.55  | 385.10 | Phenols                          | 20,760    | 2,870     | 4,321     | 108,900   | 99,090    | 103,600   | 18,710    | 19,200    | 21,950    |
| Com_162_neg | 1-O-beta-D-Glucopyranosyl sinapate             | C17H22O10     | 386.10 | 7.87  | 385.10 | Organic Acid And Its Derivatives | 48,570    | 13,480    | 6,601     | 166,500   | 160,400   | 148,800   | 64,300    | 53,620    | 58,280    |
| Com_303_neg | 2,3,5,4-Tetrahydroxystilbene-2-O-b-D-glucoside | C20H22O9      | 406.38 | 9.30  | 405.12 | Others                           | 1,314,000 | 26,510    | 17,620    | 163,700   | 153,300   | 140,800   | 246,400   | 284,500   | 253,800   |
| Com_266_neg | 2,3-Dihydroxybenzoic acid                      | C7H6O4        | 154.03 | 0.73  | 153.20 | Organic Acid And Its Derivatives | 3,062,000 | 368,400   | 271,300   | 546,000   | 513,600   | 675,100   | 601,300   | 433,100   | 468,400   |
| Com_325_pos | 2,4-Epibrassinolide                            | C28H48O6      | 480.68 | 11.57 | 481.35 | Others                           | 8,727     | 9,883     | 13,260    | 12,200    | 19,460    | 11,650    | 7,175     | 5,976     | 11,130    |
| Com_198_neg | 2,5-Dihydroxybenzoic acid                      | C7H6O4        | 154.12 | 0.72  | 153.00 | Organic Acid And Its Derivatives | 6,230,000 | 1,053,000 | 872,500   | 927,700   | 1,058,000 | 1,027,000 | 1,270,000 | 1,335,000 | 1,183,000 |
| Com_326_pos | 2,6-Diaminoimelic Acid                         | C7H14N2O4     | 190.20 | 0.70  | 191.10 | Organic Acid And Its Derivatives | 605,200   | 768,300   | 497,700   | 162,900   | 158,300   | 160,600   | 706,200   | 734,800   | 668,700   |
| Com_329_pos | 2-Amino-1,3,4-tetradecanetriol                 | C14H31NO3     | 261.40 | 7.80  | 262.30 | Amino Acid And Its Derivatives   | 14,910    | 15,050    | 12,920    | 14,180    | 2,972     | 15,720    | 9,361     | 12,370    | 9,567     |
| Com_406_pos | 2-Amino-4-hydroxybutyric acid                  | C4H9NO3       | 119.12 | 0.76  | 120.00 | Amino Acid And Its Derivatives   | 513,000   | 805,700   | 1,117,000 | 218,800   | 215,400   | 200,500   | 420,900   | 405,800   | 349,200   |
| Com_625_pos | 2'-Deoxyadenosine 5'-monophosphate             | C10H14N5O6P   | 331.22 | 0.92  | 332.00 | Nucleotide And Its Derivates     | 156,700   | 148,300   | 162,600   | 305,700   | 285,800   | 286,200   | 92,670    | 103,800   | 119,000   |
| Com_627_pos | 2'-Deoxycytidine 5'-diphosphate                | C9H12N3Na2O7P | 351.16 | 11.75 | 358.10 | Nucleotide And Its Derivates     | 297,000   | 2,262,000 | 2,241,000 | 294,100   | 285,600   | 318,600   | 388,800   | 520,200   | 514,900   |
| Com_626_pos | 2'-Deoxycytidine 5'-monophosphate              | C9H14N3O7P    | 307.20 | 0.84  | 308.00 | Nucleotide And Its Derivates     | 56,190    | 23,640    | 23,990    | 76,470    | 58,850    | 93,880    | 29,230    | 39,490    | 33,580    |
| Com_211_neg | 2-Deoxyribose 1-Phosphate                      | C5H11O7P      | 214.11 | 0.57  | 213.10 | Carbohydrates                    | 89,170    | 24,910    | 25,730    | 32,750    | 39,500    | 37,940    | 60,550    | 32,880    | 20,660    |
| Com_135_neg | 2-Deoxyribose 5'-phosphate                     | C5H11O7P      | 214.10 | 0.65  | 213.10 | Carbohydrates                    | 64,760    | 134,900   | 49,280    | 49,020    | 33,910    | 52,430    | 39,890    | 45,800    | 47,800    |
| Com_115_neg | 2-furanoic acid                                | C5H4O3        | 112.08 | 0.60  | 111.02 | Organic Acid And Its Derivatives | 1,337,000 | 453,400   | 319,100   | 1,070,000 | 1,330,000 | 1,359,000 | 1,120,000 | 1,069,000 | 749,000   |

|             |                                        |            |        |       |        |                                  |           |           |           |           |           |           |           |           |           |
|-------------|----------------------------------------|------------|--------|-------|--------|----------------------------------|-----------|-----------|-----------|-----------|-----------|-----------|-----------|-----------|-----------|
| Com_629_pos | 2-Hydroxy-6-Aminopurine                | C5H5N5O    | 151.13 | 0.95  | 152.10 | Nucleotide And Its Derivates     | 4,126,000 | 2,151,000 | 1,707,000 | 1,381,000 | 1,237,000 | 1,287,000 | 1,539,000 | 1,146,000 | 1,354,000 |
| Com_209_neg | 2-Hydroxybutanoic acid                 | C4H8O3     | 104.10 | 0.62  | 103.00 | Organic Acid And Its Derivatives | 13,180    | 13,480    | 8,795     | 19,610    | 23,540    | 26,500    | 13,140    | 10,800    | 9,175     |
| Com_628_pos | 2-Hydroxycinnamate                     | C9H8O3     | 164.16 | 5.46  | 165.06 | Organic Acid And Its Derivatives | 832,947   | 1,026,216 | 922,975   | 78,170    | 75,270    | 78,100    | 438,500   | 487,900   | 397,400   |
| Com_208_neg | 2-Hydroxyisocaproic Acid               | C6H12O3    | 132.16 | 0.70  | 131.10 | Organic Acid And Its Derivatives | 15,480    | 6,395     | 13,190    | 12,840    | 19,210    | 9,967     | 13,600    | 9,491     | 8,351     |
| Com_45_neg  | 2-Isopropylmalic acid                  | C7H12O5    | 176.17 | 0.66  | 177.05 | Organic Acid And Its Derivatives | 417,300   | 404,100   | 825,200   | 183,800   | 191,600   | 171,600   | 638,100   | 511,500   | 533,900   |
| Com_43_neg  | 2-Methylglutaric Acid                  | C6H10O4    | 146.14 | 0.64  | 145.10 | Organic Acid And Its Derivatives | 507,500   | 1,836,000 | 2,370,000 | 300,200   | 235,000   | 332,600   | 696,300   | 554,100   | 571,300   |
| Com_559_pos | 2'-O-methyladenosine                   | C11H15N5O4 | 281.27 | 1.17  | 282.20 | Nucleotide And Its Derivates     | 2,403,000 | 650,600   | 908,100   | 488,000   | 375,900   | 405,600   | 735,100   | 738,700   | 660,800   |
| Com_269_neg | 2-Oxoadipic acid                       | C6H8O5     | 160.04 | 0.78  | 159.10 | Organic Acid And Its Derivatives | 112,500   | 109,600   | 79,580    | 198,500   | 180,100   | 206,300   | 95,910    | 101,900   | 92,060    |
| Com_560_pos | 2-Phenylglycine                        | C8H9NO2    | 151.16 | 1.16  | 152.00 | Amino Acid And Its Derivatives   | 4,586,000 | 2,294,000 | 2,223,000 | 1,562,000 | 1,400,000 | 1,509,000 | 1,827,000 | 1,728,000 | 1,786,000 |
| Com_561_pos | 2-Pyridinecarboxylic acid              | C6H5NO2    | 123.11 | 0.87  | 124.00 | Organic Acid And Its Derivatives | 1,964,000 | 1,967,000 | 1,433,000 | 1,104,000 | 966,600   | 1,030,000 | 1,377,000 | 1,307,000 | 1,192,000 |
| Com_200_neg | 3-(2-Naphthyl)-D-alanine               | C13H13NO2  | 215.10 | 5.90  | 214.10 | Amino Acid And Its Derivatives   | 23,380    | 4,786     | 3,989     | 30,580    | 35,380    | 20,390    | 13,820    | 9,574     | 4,066     |
| Com_554_pos | 3,4-Dihydroxybenzaldehyde              | C7H6O3     | 138.12 | 3.31  | 139.04 | Phenols                          | 1,062,000 | 134,400   | 141,900   | 89,944    | 92,160    | 83,478    | 166,600   | 222,000   | 154,400   |
| Com_274_neg | 3,7-Di-O-methylquercetin               | C17H14O7   | 330.07 | 11.80 | 329.10 | Flavonoids                       | 3,828,000 | 420,700   | 501,300   | 235,100   | 231,600   | 227,000   | 1,326,000 | 1,352,000 | 1,061,000 |
| Com_439_pos | 3,4,5-Triceun 3-O-benzoylflavonoids    | C24H26O12  | 506.46 | 6.51  | 507.15 | Flavonoids                       | 126,100   | 20,430    | 13,880    | 268,200   | 274,200   | 264,700   | 60,300    | 70,670    | 83,210    |
| Com_292_neg | 3-Aminosalicylic Acid                  | C7H7NO3    | 153.14 | 3.49  | 152.00 | Organic Acid And Its Derivatives | 111,629   | 106,889   | 128,487   | 159,913   | 138,264   | 127,873   | 117,300   | 87,620    | 58,210    |
| Com_438_pos | 3-Chloro-L-Tyrosine                    | C9H10ClNO3 | 215.63 | 4.35  | 216.00 | Amino Acid And Its Derivatives   | 260,400   | 72,470    | 30,730    | 66,770    | 37,660    | 48,540    | 111,000   | 123,700   | 81,850    |
| Com_291_neg | 3-Dehydroshikimic acid                 | C7H8O5     | 172.14 | 0.57  | 171.03 | Organic Acid And Its Derivatives | 3,183,000 | 3,034,000 | 2,988,000 | 2,204,000 | 2,246,000 | 2,629,000 | 2,151,000 | 2,031,000 | 1,924,000 |
| Com_293_neg | 3-Hydroxy-4-methyl-3-carboxypentanoate |            |        | 0.70  | 175.00 | Others                           | 275,800   | 158,500   | 272,600   | 888,800   | 548,400   | 458,000   | 384,900   | 439,800   | 493,600   |
| Com_429_pos | 3-Hydroxy-9,10-Dimethoxypterocarpan    | C17H16O5   | 300.31 | 0.63  | 301.11 | Others                           | 55,780    | 42,530    | 23,120    | 123,700   | 97,840    | 96,350    | 45,560    | 54,360    | 59,530    |
| Com_290_neg | 3-Hydroxybutyrate                      | C4H8O3     | 104.10 | 0.56  | 103.10 | Organic Acid And Its Derivatives | 1,246,000 | 102,900   | 124,700   | 78,570    | 83,330    | 109,900   | 285,200   | 172,100   | 217,700   |
| Com_242_neg | 3-Hydroxy-glabrol                      | C25H28O5   | 40.50  | 0.61  | 40.70  | Phenols                          | 3,733     | 10,010    | 5,538     | 10,610    | 11,700    | 7,895     | 7,547     | 6,336     | 2,018     |
| Com_637_pos | 3-Hydroxyhippuric Acid                 | C9H9NO4    | 195.17 | 0.94  | 196.10 | Organic Acid And Its Derivatives | 68,600    | 10,650    | 3,258     | 248,000   | 216,400   | 188,500   | 116,300   | 114,800   | 95,950    |
| Com_289_neg | 3-Hydroxymorindone                     | C15H10O6   | 286.24 | 12.98 | 285.04 | Phenols                          | 14,879    | 11,140    | 7,230     | 15,200    | 13,340    | 13,050    | 1,504     | 1,537     | 1,810     |

|             |                                                   |            |        |       |        |                                  |           |           |           |           |           |           |           |           |           |
|-------------|---------------------------------------------------|------------|--------|-------|--------|----------------------------------|-----------|-----------|-----------|-----------|-----------|-----------|-----------|-----------|-----------|
| Com_244_neg | 3-Indoleacrylic acid                              | C11H9NO2   | 187.20 | 4.54  | 186.06 | Amino Acid And Its Derivatives   | 50,810    | 303,000   | 325,600   | 97,150    | 72,160    | 65,130    | 98,730    | 102,400   | 105,900   |
| Com_147_neg | 3-O-Feruloylquinic acid                           | C17H20O9   | 368.34 | 4.71  | 367.00 | Organic Acid And Its Derivatives | 55,990    | 9,687     | 10,680    | 130,600   | 104,500   | 109,000   | 35,270    | 36,820    | 27,080    |
| Com_188_neg | 3-Phenylpropanoic acid                            | C9H10O2    | 150.17 | 0.63  | 149.06 | Organic Acid And Its Derivatives | 37,230    | 18,030    | 23,480    | 34,410    | 30,000    | 40,910    | 19,830    | 21,740    | 19,600    |
| Com_649_pos | 4,6-Dihydroxyquinoline O-hexoside                 |            |        | 12.61 | 324.20 | Amino Acid And Its Derivatives   | 12,980    | 7,887     | 9,281     | 15,790    | 26,340    | 28,100    | 9,757     | 6,172     | 7,242     |
| Com_697_pos | 4-Acetamidobutyric Acid                           | C6H11NO3   | 145.16 | 0.78  | 146.10 | Organic Acid And Its Derivatives | 1,308,000 | 669,600   | 917,700   | 1,287,000 | 1,089,000 | 1,095,000 | 1,814,000 | 1,638,000 | 1,601,000 |
| Com_698_pos | 4beta-Hydroxy-11-O-(2'-pyrolylcarboxy)epilupinine | C15H22N2O3 | 278.35 | 5.66  | 279.10 | Alkaloids                        | 34,950    | 30,600    | 36,750    | 12,580    | 10,010    | 12,600    | 12,970    | 14,010    | 10,410    |
| Com_696_pos | Dimethylaminobenzaldehyde                         | C9H11NO    | 149.19 | 0.79  | 150.09 | Others                           | 58,770    | 16,380    | 11,480    | 35,750    | 43,950    | 31,880    | 18,670    | 7,031     | 10,220    |
| Com_695_pos | 4-Guanidinobutyric acid                           | C5H11N3O2  | 145.16 | 0.78  | 146.10 | Organic Acid And Its Derivatives | 4,280,000 | 1,535,000 | 1,508,000 | 6,353,000 | 5,431,000 | 5,751,000 | 6,217,000 | 6,001,000 | 5,501,000 |
| Com_394_pos | 4-Hydroxybenzoate                                 | C7H6O3     | 138.12 | 2.98  | 139.00 | Phenols                          | 1,326,000 | 130,400   | 179,200   | 42,000    | 32,790    | 39,990    | 250,300   | 221,500   | 257,100   |
| Com_617_pos | 4'-O-β-Glucopyranosyl-5-O-methylvisamminol        | C22H28O10  | 452.45 | 6.52  | 453.18 | Flavonoids                       | 148,600   | 52,950    | 40,690    | 98,820    | 117,700   | 148,600   | 84,150    | 117,900   | 85,850    |
| Com_241_neg | 4-p-Coumaroylquinic acid                          | C16H18O8   | 338.31 | 3.97  | 337.10 | Phenols                          | 28,340    | 3,518     | 2,764     | 9,891     | 9,449     | 9,163     | 5,991     | 7,310     | 10,300    |
| Com_613_pos | 4-Pyridoxate                                      | C8H9NO4    | 183.16 | 1.06  | 184.10 | Organic Acid And Its Derivatives | 144,100   | 40,350    | 20,790    | 39,230    | 37,080    | 18,620    | 83,730    | 93,530    | 83,160    |
| Com_494_pos | 5,6-Dihydro-5-methyluracil                        | C5H8N2O2   | 128.13 | 0.60  | 129.10 | Nucleotide And Its Derivates     | 299,200   | 580,200   | 563,200   | 361,800   | 315,500   | 335,100   | 288,000   | 276,800   | 279,900   |
| Com_562_pos | 5-Aminosalicylic Acid                             | C7H7NO3    | 153.14 | 1.46  | 154.00 | Organic Acid And Its Derivatives | 630,500   | 6,001,000 | 4,812,000 | 217,800   | 191,600   | 187,900   | 718,200   | 752,700   | 805,000   |
| Com_483_pos | 5-Ethyl-2'-deoxyuridine                           | C11H16N2O5 | 256.26 | 0.64  | 257.10 | Nucleotide And Its Derivates     | 55,180    | 35,160    | 24,750    | 85,470    | 80,910    | 87,010    | 97,880    | 61,550    | 83,570    |
| Com_136_neg | 5-hydroxyhexanoic acid                            | C6H12O3    | 132.08 | 0.74  | 131.08 | Organic Acid And Its Derivatives | 74,370    | 35,090    | 39,170    | 91,050    | 98,680    | 75,800    | 57,080    | 37,900    | 38,350    |
| Com_701_pos | 5-Hydroxymethylfurfural                           | C6H6O3     | 126.11 | 0.78  | 127.04 | Others                           | 227,800   | 131,700   | 126,800   | 263,600   | 224,300   | 245,000   | 175,500   | 159,800   | 141,000   |
| Com_421_pos | 5-Methoxyindoleacetic acid                        | C11H11NO3  | 205.21 | 2.55  | 206.00 | Amino Acid And Its Derivatives   | 408,600   | 1,519,000 | 1,180,000 | 379,600   | 308,800   | 325,300   | 912,800   | 952,100   | 865,100   |
| Com_488_pos | 5-Methylcytidine                                  | C10H15N3O5 | 257.24 | 0.71  | 258.20 | Nucleotide And Its Derivates     | 380,200   | 174,600   | 137,800   | 421,300   | 313,700   | 270,100   | 223,500   | 198,100   | 221,200   |
| Com_557_pos | 5-Methylcytosine                                  | C5H7N3O    | 125.13 | 1.38  | 126.10 | Nucleotide And Its Derivates     | 76,320    | 20,990    | 30,510    | 76,107    | 74,682    | 70,143    | 27,390    | 22,030    | 12,740    |
| Com_556_pos | 5-Methyltryptamine                                | C11H14N2   | 174.24 | 8.13  | 175.10 | Amino Acid And Its Derivatives   | 23,320    | 22,050    | 4,663     | 65,740    | 31,730    | 43,740    | 30,320    | 45,510    | 46,160    |
| Com_236_neg | 5-O-p-Coumaroylquinic acid                        | C16H18O8   | 338.00 | 4.20  | 337.00 | Organic Acid And Its Derivatives | 94,820    | 25,440    | 27,990    | 19,420    | 17,820    | 18,680    | 20,670    | 22,470    | 22,200    |
| Com_151_neg | 5-Oxoproline                                      | C5H7NO3    | 129.04 | 0.75  | 128.00 | Amino Acid And Its Derivatives   | 343,700   | 93,890    | 149,000   | 22,810    | 20,840    | 17,600    | 97,590    | 98,790    | 75,480    |

|             |                                                  |                |        |       |        |                                  |           |           |           |           |           |           |           |           |           |
|-------------|--------------------------------------------------|----------------|--------|-------|--------|----------------------------------|-----------|-----------|-----------|-----------|-----------|-----------|-----------|-----------|-----------|
| Com_175_neg | 5-Phosphoribosyl 1-pyrophosphate                 | C5H13O14P3     | 390.07 | 0.62  | 389.00 | Carbohydrates                    | 43,120    | 23,570    | 31,310    | 39,350    | 28,430    | 27,780    | 28,320    | 31,600    | 21,830    |
| Com_699_pos | 6,7-Dimethoxy-4-Methylcoumarin                   | C12H12O4       | 220.22 | 6.51  | 221.10 | Phenylpropanoids                 | 83,950    | 28,877    | 27,063    | 73,500    | 70,730    | 51,050    | 36,910    | 32,390    | 38,160    |
| Com_700_pos | 6-Aminohexanoic acid                             | C6H13NO2       | 131.17 | 1.16  | 132.00 | Amino Acid And Its Derivatives   | 185,000   | 381,700   | 383,500   | 70,250    | 62,250    | 69,860    | 123,900   | 98,010    | 109,400   |
| Com_199_neg | 6-Deoxycatalpol +HCOOH                           | C15H22O9.HCOOH | 392.35 | 17.58 | 391.13 | Others                           | 638       | 6,938     | 10,000    | 5,026     | 4,706     | 1,680     | 842       | 1,279     | 1,351     |
| Com_364_pos | 6-Deoxy-6-oxo-6-phenyl-1,3-bisphosphoguanosine A | C19H16O7       | 356.33 | 0.62  | 357.10 | Flavonoids                       | 31,640    | 10,760    | 5,799     | 79,310    | 77,250    | 87,230    | 48,560    | 54,660    | 48,460    |
| Com_693_pos | 6-Gingerol                                       | C17H26O4       | 294.39 | 10.52 | 307.17 | Phenols                          | 204,000   | 285,200   | 196,900   | 1,286,000 | 1,227,000 | 1,234,000 | 1,017,000 | 462,400   | 516,300   |
| Com_376_pos | 6-Hydroxynicotinic acid                          | C6H5NO3        | 139.11 | 1.00  | 140.00 | Organic Acid And Its Derivatives | 400,400   | 106,100   | 69,570    | 360,300   | 300,300   | 290,300   | 216,100   | 193,100   | 238,800   |
| Com_181_neg | 6-Phosphogluconic acid                           | C6H13O10P      | 276.14 | 0.67  | 275.00 | Carbohydrates                    | 65,180    | 34,580    | 16,990    | 47,480    | 56,020    | 45,850    | 26,720    | 27,920    | 42,220    |
| Com_374_pos | 6-Sialyllactose                                  | C23H39NO19     | 633.55 | 0.74  | 634.22 | Carbohydrates                    | 44,240    | 36,520    | 20,300    | 14,190    | 14,900    | 9,145     | 13,510    | 18,630    | 15,930    |
| Com_631_pos | 7-Methylguanine                                  | C6H7N5O        | 165.15 | 5.60  | 166.00 | Nucleotide And Its Derivates     | 154,200   | 17,440    | 24,730    | 35,000    | 36,390    | 29,510    | 51,150    | 62,750    | 54,060    |
| Com_593_pos | 7-O-Ethylmorrioniside                            | C19H30O11      | 434.44 | 0.62  | 457.17 | Terpenoids                       | 155,900   | 21,720    | 21,630    | 92,280    | 85,060    | 86,070    | 50,690    | 64,140    | 36,600    |
| Com_373_pos | 7-O-Methylaloeresin A                            | C29H30O11      | 554.54 | 7.22  | 555.19 | Others                           | 128,000   | 120,600   | 60,180    | 46,700    | 36,780    | 36,030    | 29,100    | 40,970    | 32,150    |
| Com_372_pos | 8-Chlro-1-tetrahydronorharmanone                 | C11H9ClN2O     | 220.66 | 1.07  | 221.00 | Others                           | 63,410    | 122,000   | 84,420    | 57,420    | 50,850    | 47,510    | 50,860    | 54,580    | 47,660    |
| Com_233_neg | 8-Gingerol                                       | C43H32O20      | 868.70 | 0.84  | 871.21 | Phenols                          | 98,290    | 352,300   | 383,600   | 35,680    | 45,220    | 43,670    | 150,400   | 132,900   | 146,400   |
| Com_451_pos | 8-hydroxy-6,7-dimethoxycoumarin                  | C11H10O5       | 222.20 | 11.26 | 223.06 | Phenylpropanoids                 | 1,737,000 | 1,788,000 | 1,472,000 | 1,665,000 | 1,250,000 | 1,306,000 | 1,921,000 | 2,439,000 | 2,751,000 |
| Com_378_pos | 8-Hydroxyguanosine                               | C10H13N5O6     | 299.24 | 0.97  | 300.10 | Nucleotide And Its Derivates     | 148,900   | 45,990    | 20,090    | 38,260    | 17,410    | 35,770    | 41,530    | 42,710    | 76,330    |
| Com_87_neg  | 8-O-Methylreyusin                                | C17H14O5       | 298.29 | 11.38 | 297.08 | Others                           | 10,000    | 8,271     | 4,075     | 107,400   | 88,940    | 87,720    | 33,010    | 29,810    | 28,730    |
| Com_379_pos | 8-Oxo-dGMP                                       | C10H13N5O5     | 283.24 | 17.78 | 284.00 | Nucleotide And Its Derivates     | 4,637     | 9,178     | 14,320    | 2,482     | 2,965     | 1,878     | 2,270     | 3,710     | 5,727     |
| Com_183_neg | 9,10-EODE                                        | C18H32O3       | 296.00 | 0.70  | 295.00 | Lipids                           | 536,200   | 368,600   | 484,400   | 422,000   | 751,500   | 453,100   | 314,100   | 478,600   | 555,600   |
| Com_86_neg  | 9-Hotre                                          | C18H30O3       | 294.43 | 14.33 | 293.00 | Lipids                           | 20,460    | 3,659     | 1,918     | 35,890    | 29,580    | 36,920    | 51,140    | 52,240    | 45,150    |
| Com_133_neg | 9-HpOTrE                                         | C18H30O4       | 310.10 | 15.80 | 309.10 | Lipids                           | 55,880    | 15,880    | 25,600    | 4,410     | 4,380     | 4,838     | 12,410    | 11,650    | 14,660    |
| Com_489_pos | 9-Hydroxy-(10E,12Z,15Z)-octadecatrienoic acid    | C18H30O3       | 294.43 | 15.21 | 295.20 | Lipids                           | 3,111,000 | 603,700   | 806,200   | 1,008,000 | 921,100   | 1,060,000 | 2,194,000 | 2,402,000 | 2,306,000 |
| Com_491_pos | Abscisic acid                                    | C15H20O4       | 264.32 | 7.14  | 265.14 | Organic Acid And Its Derivatives | 80,870    | 59,210    | 45,460    | 58,090    | 96,453    | 95,088    | 90,130    | 109,400   | 61,420    |
| Com_81_neg  | Acacetin                                         | C16H12O5       | 284.26 | 12.01 | 283.00 | Flavonoids                       | 15,305    | 9,964     | 6,526     | 9,122     | 7,742     | 8,513     | 2,803     | 3,020     | 2,135     |
| Com_490_pos | Acetaminophen                                    | C8H9NO2        | 151.16 | 1.17  | 152.10 | Phenols                          | 4,389,000 | 2,527,000 | 2,003,000 | 1,283,000 | 1,137,000 | 1,308,000 | 1,648,000 | 1,449,000 | 1,451,000 |
| Com_492_pos | Acetylcholine                                    | C7H16ClNO2     | 181.66 | 0.82  | 164.10 | Others                           | 4,970,000 | 1,976,000 | 1,781,000 | 7,219,000 | 6,828,000 | 7,008,000 | 7,617,000 | 6,669,000 | 7,184,000 |
| Com_605_pos | Adenine                                          | C5H5N5         | 135.13 | 0.75  | 136.06 | Nucleotide And Its Derivates     | 3,917,000 | 2,062,000 | 1,364,000 | 2,010,000 | 1,937,000 | 2,047,000 | 1,785,000 | 1,765,000 | 1,493,000 |
| Com_604_pos | Adenosine                                        | C10H13N5O4     | 267.24 | 0.97  | 268.10 | Nucleotide And Its Derivates     | #####     | #####     | #####     | #####     | #####     | #####     | #####     | #####     | #####     |
| Com_180_neg | Adenosine 5'-monophosphate                       | C10H14N5O7P    | 347.22 | 0.80  | 346.00 | Nucleotide And Its Derivates     | 150,400   | 465,800   | 409,800   | 527,200   | 593,300   | 355,600   | 468,000   | 462,200   | 378,200   |

|             |                             |               |        |        |                              |                                  |           |           |           |           |           |           |           |           |           |
|-------------|-----------------------------|---------------|--------|--------|------------------------------|----------------------------------|-----------|-----------|-----------|-----------|-----------|-----------|-----------|-----------|-----------|
| Com_608_pos | Adenosine O-ribose          |               | 0.94   | 400.20 | Nucleotide And Its Derivates | 103,900                          | 74,260    | 67,310    | 119,100   | 101,400   | 104,200   | 84,940    | 82,590    | 79,790    |           |
| Com_606_pos | Adenosine-3'-monophosphate  | C10H14N5O7P   | 347.22 | 0.70   | 348.10                       | Nucleotide And Its Derivates     | 899,700   | 3,278,000 | 2,369,000 | 2,794,000 | 2,696,000 | 999,600   | 1,678,000 | 1,799,000 | 1,873,000 |
| Com_114_neg | Adipic acid                 | C6H10O4       | 146.06 | 0.70   | 145.06                       | Organic Acid And Its Derivatives | 539,500   | 2,331,000 | 2,940,000 | 252,100   | 313,200   | 355,500   | 769,100   | 731,900   | 737,100   |
| Com_256_neg | Afzelechin                  | C15H14O5      | 274.08 | 0.70   | 273.00                       | Flavonoids                       | 357,500   | 287,100   | 281,100   | 476,300   | 434,300   | 432,600   | 288,800   | 328,300   | 322,400   |
| Com_332_pos | Agmatine Sulfate            | C5H14N4       | 130.19 | 0.63   | 131.13                       | Phenols                          | 5,984     | 4,718     | 5,818     | 8,916     | 9,463     | 10,350    | 6,275     | 12,080    | 7,479     |
| Com_333_pos | Albiflorin                  | C23H28O11     | 480.46 | 10.31  | 481.17                       | Terpenoids                       | 68,873    | 28,988    | 38,040    | 93,030    | 97,010    | 100,400   | 20,560    | 22,170    | 22,520    |
| Com_121_neg | Allantoin                   | C4H6N4O3      | 158.12 | 0.67   | 157.00                       | Others                           | 43,320    | 39,710    | 55,010    | 18,400    | 22,010    | 17,670    | 74,700    | 65,500    | 68,320    |
| Com_331_pos | Allopurinol                 | C5H4N4O       | 136.11 | 0.70   | 137.00                       | Nucleotide And Its Derivates     | 457,900   | 200,100   | 149,700   | 235,500   | 214,100   | 179,500   | 234,400   | 186,600   | 188,000   |
| Com_316_neg | Allysine                    | C6H11NO3      | 145.07 | 0.70   | 144.10                       | Amino Acid And Its Derivatives   | 89,090    | 74,520    | 95,390    | 55,430    | 58,510    | 39,670    | 95,380    | 89,430    | 89,450    |
| Com_119_neg | alpha-Ketoglutaric acid     | C5H6O5        | 146.10 | 0.67   | 145.00                       | Organic Acid And Its Derivatives | 88,960    | 236,900   | 223,300   | 22,050    | 26,810    | 26,410    | 76,060    | 61,280    | 36,840    |
| Com_476_pos | alpha-Linolenic acid        | C18H30O2      | 278.43 | 16.75  | 279.23                       | Lipids                           | 168,500   | 25,610    | 22,210    | 28,150    | 24,150    | 33,860    | 50,600    | 56,640    | 57,790    |
| Com_327_pos | alpha-Terthienyl            | C12H8S3       | 248.39 | 6.84   | 248.99                       | Others                           | 12,080    | 3,556     | 2,227     | 18,290    | 19,500    | 20,740    | 20,140    | 17,430    | 24,140    |
| Com_116_neg | Amentoflavone               | C30H18O10     | 538.46 | 10.70  | 537.10                       | Flavonoids                       | 32,831    | 23,924    | 19,587    | 27,290    | 22,110    | 26,140    | 14,830    | 12,120    | 14,420    |
| Com_155_neg | Aminomalonic acid           | C3H5NO4       | 119.02 | 0.73   | 118.00                       | Organic Acid And Its Derivatives | 1,168,000 | 746,700   | 1,041,000 | 423,000   | 482,000   | 458,200   | 683,600   | 665,000   | 656,100   |
| Com_117_neg | Androsin                    | C15H20O8      | 328.32 | 1.59   | 327.11                       | Phenols                          | 343,000   | 82,700    | 143,100   | 98,138    | 103,639   | 96,896    | 150,900   | 103,400   | 109,400   |
| Com_449_pos | ANGELOL-K                   | C20H24O7      | 376.41 | 12.24  | 377.16                       | Others                           | 649,500   | 2,196,000 | 1,274,000 | 1,231,000 | 783,600   | 769,400   | 700,500   | 705,100   | 692,400   |
| Com_222_neg | Apigenin                    | C15H10O5      | 270.24 | 9.82   | 269.00                       | Flavonoids                       | 20,284    | 20,023    | 16,354    | 17,723    | 16,975    | 15,086    | 14,250    | 13,020    | 10,460    |
| Com_221_neg | Apigenin 4-O-rhamnoside     | C21H20O9      | 416.38 | 9.91   | 415.10                       | Flavonoids                       | 11,340    | 4,430     | 22,238    | 17,210    | 10,720    | 16,620    | 53,160    | 61,640    | 79,930    |
| Com_224_neg | Apigenin 5-O-glucoside      | C21H20O10     | 432.38 | 6.93   | 431.10                       | Flavonoids                       | 71,610    | 13,540    | 43,510    | 301,800   | 282,600   | 231,500   | 154,100   | 135,900   | 154,500   |
| Com_18_neg  | Apigenin-6,8-di-C-glycoside | C27H30O15     | 594.52 | 4.83   | 593.15                       | Flavonoids                       | #####     | 1,783,000 | 1,349,000 | 3,869,000 | 3,448,000 | 3,462,000 | #####     | #####     | #####     |
| Com_223_neg | Apigenin-7-glucoside        | C21H20O10     | 432.38 | 7.15   | 431.10                       | Flavonoids                       | 611,000   | 56,440    | 169,100   | 41,890    | 35,270    | 35,730    | 175,300   | 159,600   | 193,900   |
| Com_447_pos | Apo-13-zeaxanthinone        | C18H26O2      | 274.40 | 14.54  | 275.20                       | Others                           | 50,620    | 20,350    | 9,563     | 9,648     | 16,790    | 15,950    | 25,390    | 26,270    | 18,910    |
| Com_567_pos | Arabidopyl ketoadipic acid  | C15H14O9      | 338.27 | 18.27  | 339.07                       | Organic Acid And Its Derivatives | 37,600    | 28,520    | 30,920    | 51,950    | 60,590    | 64,450    | 32,980    | 39,050    | 35,380    |
| Com_568_pos | Arabidopyl shikimic acid    | C16H16O9      | 352.29 | 14.54  | 353.09                       | Organic Acid And Its Derivatives | 27,870    | 17,730    | 20,400    | 37,170    | 28,820    | 37,680    | 16,770    | 20,110    | 18,540    |
| Com_566_pos | Arctigenin                  | C21H24O6      | 372.41 | 7.79   | 373.17                       | Phenols                          | 11,700    | 2,409     | 11,942    | 14,490    | 16,770    | 19,960    | 10,530    | 15,240    | 21,150    |
| Com_565_pos | Artemisinin                 | C15H22O5      | 282.33 | 19.22  | 283.15                       | Terpenoids                       | 850,300   | 894,600   | 933,800   | 854,800   | 852,900   | 884,000   | 980,000   | 854,800   | 988,100   |
| Com_313_neg | Astragalin                  | C21H20O11     | 448.38 | 7.54   | 447.10                       | Flavonoids                       | #####     | #####     | 7,047,000 | 659,600   | 610,100   | 646,500   | 7,104,000 | 6,739,000 | 6,636,000 |
| Com_179_neg | ATP                         | C10H16N5O13P3 | 507.18 | 0.70   | 506.00                       | Nucleotide And Its Derivates     | 38,430    | 14,480    | 18,640    | 36,870    | 28,640    | 23,970    | 18,570    | 17,440    | 26,770    |
| Com_704_pos | Aucubin                     | C15H22O9      | 346.33 | 1.07   | 369.11                       | Lipids                           | 32,530    | 11,780    | 15,430    | 35,710    | 27,300    | 25,570    | 42,630    | 32,750    | 45,550    |
| Com_703_pos | Azelaic Acid                | C9H16O4       | 188.22 | 0.98   | 189.10                       | Organic Acid And Its Derivatives | 64,120    | 29,560    | 11,010    | 79,770    | 60,640    | 62,800    | 50,310    | 32,050    | 21,000    |
| Com_702_pos | Benzamidine                 | C7H8N2        | 120.15 | 1.65   | 121.10                       | Phenols                          | 4,037,000 | #####     | #####     | 1,128,000 | 957,300   | 972,500   | 2,753,000 | 2,783,000 | 2,537,000 |
| Com_484_pos | Berberubine                 | C19H16NO4.Cl  | 357.79 | 5.64   | 372.11                       | Alkaloids                        | 57,940    | 6,085     | 1,075     | 24,330    | 12,390    | 12,210    | 15,890    | 11,530    | 9,048     |

|             |                                          |            |        |       |        |                                  |           |           |           |           |           |           |           |           |           |
|-------------|------------------------------------------|------------|--------|-------|--------|----------------------------------|-----------|-----------|-----------|-----------|-----------|-----------|-----------|-----------|-----------|
| Com_718_pos | Bergapten                                | C12H8O4    | 216.19 | 8.38  | 217.05 | Phenylpropanoids                 | 17,230    | 24,550    | 2,458     | 67,310    | 75,850    | 72,660    | 46,790    | 43,910    | 39,830    |
| Com_507_pos | beta-Carotene                            | C40H56     | 536.87 | 23.59 | 537.45 | Terpenoids                       | #####     | #####     | #####     | #####     | #####     | #####     | #####     | #####     | #####     |
| Com_501_pos | Betaine                                  | C5H11NO2   | 117.15 | 0.82  | 118.10 | Alkaloids                        | #####     | #####     | 6,393,000 | #####     | #####     | #####     | #####     | #####     | #####     |
| Com_387_pos | beta-Nicotyrine                          | C10H10N2   | 158.20 | 2.84  | 159.09 | Alkaloids                        | 609,200   | 2,881,000 | 2,360,000 | 648,500   | 578,900   | 592,700   | 625,200   | 662,500   | 640,000   |
| Com_72_neg  | Betulinic acid                           | C30H48O3   | 456.70 | 18.17 | 455.35 | Terpenoids                       | 88,866    | 70,225    | 73,231    | 82,680    | 24,340    | 26,710    | 33,320    | 79,890    | 46,670    |
| Com_495_pos | Biliverdin                               | C33H34N4O6 | 582.65 | 11.00 | 583.25 | Others                           | 5,449     | 44,120    | 18,770    | 16,080    | 20,600    | 25,170    | 20,170    | 12,040    | 13,670    |
| Com_37_neg  | Boc-β-cyano-L-alanine                    | C9H14N2O4  | 214.22 | 5.78  | 227.18 | Amino Acid And Its Derivatives   | 18,838    | 12,233    | 605       | 14,470    | 16,450    | 15,930    | 8,381     | 7,054     | 6,028     |
| Com_630_pos | Butylphthalide                           | C12H14O2   | 190.24 | 15.81 | 181.21 | Others                           | 6,204     | 2,428     | 6,912     | 7,082     | 2,790     | 4,084     | 3,615     | 2,461     | 3,971     |
| Com_367_pos | Caffeic Acid                             | C9H8O4     | 180.16 | 3.08  | 181.05 | Organic Acid And Its Derivatives | #####     | #####     | #####     | 89,830    | 110,400   | 59,810    | #####     | #####     | #####     |
| Com_235_neg | Caffeic acid O-glucoside                 | C15H18O9   | 342.00 | 1.40  | 341.00 | Organic Acid And Its Derivatives | 7,279,000 | #####     | #####     | 1,974,000 | 1,365,000 | 1,636,000 | 2,617,000 | 2,931,000 | 2,626,000 |
| Com_543_pos | Calycosin-7-O-glucoside                  | C22H22O10  | 446.40 | 5.32  | 447.13 | Flavonoids                       | 507,400   | 19,550    | 15,530    | 59,920    | 32,080    | 50,550    | 58,480    | 74,370    | 70,140    |
| Com_30_neg  | Cellotriose                              | C18H32O16  | 504.44 | 0.91  | 503.20 | Carbohydrates                    | 1,485,000 | 1,096,000 | 1,979,000 | 945,500   | 823,100   | 694,500   | 844,300   | 799,000   | 854,200   |
| Com_601_pos | C-hexosyl-apigenin O-hexosyl-O-hexoside  | C33H40O20  | 756.66 | 3.73  | 757.22 | Flavonoids                       | 68,880    | 25,863    | 23,864    | 30,750    | 22,330    | 25,580    | 26,850    | 28,300    | 28,350    |
| Com_602_pos | C-hexosyl-apigenin O-p-coumaroylhexoside | C36H36O17  | 740.66 | 5.88  | 741.20 | Flavonoids                       | 226,900   | 55,760    | 17,610    | 28,080    | 31,050    | 29,500    | 76,680    | 85,090    | 105,300   |
| Com_527_pos | Chinese bittersweet alkaloid             | C18H33N3O3 | 339.47 | 6.75  | 340.10 | Alkaloids                        | 77,580    | 30,220    | 36,980    | 171,326   | 160,282   | 163,033   | 124,600   | 140,700   | 186,400   |
| Com_66_neg  | Chlorogenic acid methyl ester            | C17H20O9   | 368.11 | 5.20  | 367.00 | Organic Acid And Its Derivatives | 87,670    | 11,540    | 10,920    | 129,000   | 127,900   | 140,500   | 41,130    | 43,660    | 40,730    |
| Com_529_pos | Cholesterol                              | C27H46O    | 386.65 | 13.04 | 387.10 | Lipids                           | 1,315,000 | 1,198,000 | 1,135,000 | 1,186,000 | 1,113,000 | 1,120,000 | 931,600   | 1,054,000 | 1,075,000 |
| Com_528_pos | Choline                                  | C5H14NO+   | 104.17 | 0.70  | 105.10 | Others                           | 1,959,000 | 1,769,000 | 2,048,000 | 1,237,000 | 1,259,000 | 1,331,000 | 1,241,000 | 1,128,000 | 1,126,000 |
| Com_524_pos | Chrysoeriol                              | C16H12O6   | 300.26 | 8.98  | 301.10 | Flavonoids                       | 107,800   | 27,490    | 63,720    | 183,600   | 171,000   | 189,000   | 56,370    | 65,150    | 73,200    |
| Com_74_neg  | Chrysoeriol 8-C-pentosyl-O-rutinoside    |            | 740.20 | 8.07  | 739.20 | Flavonoids                       | 132,700   | 1,507     | 3,305     | 8,490     | 9,188     | 6,021     | 15,760    | 17,730    | 14,350    |
| Com_416_pos | Chrysoeriol C-hexoside                   | C22H22O11  | 462.40 | 5.69  | 463.12 | Flavonoids                       | 2,751,000 | 234,100   | 583,800   | 639,700   | 560,300   | 644,100   | 562,200   | 586,000   | 620,400   |
| Com_73_neg  | Chrysoeriol O-acetylhexoside             |            | 504.10 | 0.90  | 503.10 | Flavonoids                       | 245,400   | 279,100   | 366,900   | 160,700   | 180,300   | 184,600   | 221,100   | 189,500   | 254,100   |
| Com_564_pos | Cinnamoyl tyramine                       |            |        | 4.40  | 268.00 | Amino Acid And Its Derivatives   | 8,511     | 7,438     | 8,196     | 18,040    | 22,690    | 23,090    | 37,450    | 23,300    | 31,370    |
| Com_186_neg | Citraconic Acid                          | C5H6O4     | 130.10 | 0.57  | 129.00 | Organic Acid And Its Derivatives | 539,800   | 310,200   | 231,900   | 471,000   | 413,900   | 546,800   | 491,600   | 481,600   | 403,300   |
| Com_132_neg | Citramalate                              | C5H8O5     | 148.00 | 0.60  | 147.00 | Organic Acid And Its Derivatives | 28,840    | 11,050    | 7,108     | 20,600    | 11,030    | 28,080    | 13,250    | 8,610     | 8,318     |
| Com_8_neg   | Citric acid                              | C6H8O7     | 192.03 | 0.60  | 191.00 | Organic Acid And Its Derivatives | #####     | #####     | #####     | #####     | #####     | #####     | #####     | #####     | #####     |
| Com_348_pos | COLUMBIANETIN ACETATE                    | C16H16O5   | 288.30 | 12.56 | 289.11 | Phenylpropanoids                 | 38,066    | 26,781    | 28,479    | 82,620    | 85,220    | 66,760    | 21,350    | 24,700    | 17,950    |
| Com_276_neg | Columbin                                 | C20H22O6   | 358.39 | 10.83 | 313.22 | Others                           | 8,408     | 1,013     | 4,926     | 11,050    | 9,957     | 11,390    | 1,935     | 2,540     | 1,828     |
| Com_347_pos | Coniferyl aldehyde                       | C10H10O3   | 178.19 | 14.95 | 179.10 | Phenols                          | 142,100   | 23,060    | 44,450    | 31,860    | 31,740    | 48,580    | 98,650    | 115,100   | 105,000   |
| Com_646_pos | Cordycepin                               | C10H13N5O3 | 251.25 | 1.27  | 216.07 | Alkaloids                        | 3,988,000 | 1,969,000 | 1,696,000 | 1,178,000 | 867,200   | 894,200   | 1,545,000 | 1,504,000 | 1,376,000 |
| Com_350_pos | Corydaline                               | C22H27NO4  | 369.45 | 7.28  | 370.20 | Alkaloids                        | 31,582    | 10,480    | 3,835     | 31,680    | 31,450    | 29,290    | 5,949     | 14,490    | 10,450    |

|             |                                              |                  |        |       |        |                                  |           |           |           |           |           |           |           |           |           |
|-------------|----------------------------------------------|------------------|--------|-------|--------|----------------------------------|-----------|-----------|-----------|-----------|-----------|-----------|-----------|-----------|-----------|
| Com_653_pos | Coumarin                                     | C9H6O2           | 146.14 | 6.51  | 147.10 | Phenylpropanoids                 | 316,600   | 7,394     | 53,222    | 26,900    | 26,980    | 21,580    | 284,900   | 297,400   | 281,300   |
| Com_656_pos | C-pentosyl-C-hexosyl-alpha-D-glucopyranoside | C26H28O14        | 564.49 | 4.70  | 565.16 | Flavonoids                       | 471,200   | 74,280    | 25,110    | 5,015,000 | 4,640,000 | 4,868,000 | 933,400   | 1,036,000 | 1,012,000 |
| Com_278_neg | Creatine                                     | C4H9N3O2         | 131.13 | 0.70  | 130.10 | Amino Acid And Its Derivatives   | 396,800   | 543,400   | 495,400   | 288,500   | 164,300   | 309,800   | 200,000   | 221,500   | 206,000   |
| Com_279_neg | Crocin                                       | C20H24O4         | 328.40 | 10.65 | 327.16 | Organic Acid And Its Derivatives | 135,300   | 16,200    | 4,216     | 42,250    | 36,990    | 36,910    | 84,340    | 88,010    | 90,810    |
| Com_210_neg | Crotonoside                                  | C10H13N5O5       | 283.24 | 2.73  | 282.08 | Alkaloids                        | #####     | 9,265,000 | 8,470,000 | 7,390,000 | 7,688,000 | 7,137,000 | 9,587,000 | 8,623,000 | 7,984,000 |
| Com_280_neg | Curculigoside                                | C22H26O11        | 466.44 | 18.35 | 465.14 | Phenols                          | 9,641     | 8,168     | 4,417     | 19,540    | 13,100    | 7,269     | 1,925     | 2,418     | 1,576     |
| Com_184_neg | Cyanidin 3-O-glucoside                       | C21H21O11        | 448.30 | 8.33  | 447.30 | Flavonoids                       | 2,431,000 | 1,084,000 | 476,600   | 88,670    | 82,630    | 81,530    | 307,600   | 296,400   | 284,900   |
| Com_76_neg  | Cyanidin O-acetylhexoside                    |                  | 490.10 | 8.17  | 489.10 | Flavonoids                       | 1,579,000 | 1,991,000 | 1,982,000 | 26,590    | 28,730    | 25,920    | 361,900   | 334,300   | 303,400   |
| Com_75_neg  | Cyanidin O-diacetylhexoside-O-glyceric acid  |                  | 620.10 | 8.46  | 619.10 | Flavonoids                       | 68,530    | 155,300   | 85,670    | 266,100   | 234,000   | 253,500   | 51,970    | 45,350    | 63,720    |
| Com_711_pos | Cyanidin O-rutinoside                        | C27H31O15        | 595.52 | 5.25  | 595.17 | Flavonoids                       | 3,703,000 | 6,834,000 | 2,794,000 | 708,100   | 617,900   | 714,600   | 647,600   | 885,600   | 880,800   |
| Com_673_pos | Cytidine                                     | C9H13N3O5        | 243.22 | 0.74  | 244.10 | Nucleotide And Its Derivates     | 6,986,000 | 1,914,000 | 1,645,000 | 2,515,000 | 2,573,000 | 2,786,000 | 3,010,000 | 2,983,000 | 2,978,000 |
| Com_671_pos | Cytosine                                     | C4H5N3O          | 111.10 | 0.72  | 112.00 | Nucleotide And Its Derivates     | 3,194,000 | 1,096,000 | 774,200   | 1,288,000 | 1,188,000 | 1,187,000 | 1,528,000 | 1,428,000 | 1,402,000 |
| Com_228_neg | D-(-)-Salicin                                | C13H18O7         | 286.28 | 4.71  | 285.10 | Organic Acid And Its Derivatives | 26,740    | 26,000    | 7,132     | 16,890    | 16,510    | 20,100    | 6,563     | 6,613     | 6,839     |
| Com_620_pos | D-(+)-Octopine                               | C9H18N4O4        | 246.26 | 0.70  | 247.14 | Amino Acid And Its Derivatives   | 112,500   | 59,880    | 39,340    | 77,130    | 74,870    | 62,940    | 87,380    | 80,560    | 94,300    |
| Com_622_pos | D-2-Aminobutyric acid                        | C4H9NO2          | 103.12 | 0.71  | 104.10 | Organic Acid And Its Derivatives | 6,150,000 | 5,840,000 | 6,488,000 | 4,102,000 | 3,771,000 | 4,041,000 | 3,903,000 | 3,636,000 | 3,466,000 |
| Com_41_neg  | D-2-Hydroxypentanedioic acid                 | C5H6Na2O5        | 192.08 | 0.51  | 189.02 | Amino Acid And Its Derivatives   | 1,052,000 | 655,000   | 503,200   | 1,136,000 | 1,172,000 | 1,171,000 | 832,600   | 583,300   | 577,400   |
| Com_40_neg  | D-3-Phosphoglyceric acid                     | C3H5H2O7P        | 230.02 | 0.50  | 248.99 | Lipids                           | 55,410    | 59,770    | 61,460    | 101,100   | 87,560    | 86,470    | 137,900   | 158,200   | 117,200   |
| Com_618_pos | Daidzein                                     | C15H10O4         | 254.24 | 3.85  | 257.12 | Flavonoids                       | 17,150    | 13,840    | 18,970    | 91,790    | 95,030    | 91,430    | 171,300   | 158,400   | 111,900   |
| Com_619_pos | D-Arabitol                                   | C5H12O5          | 152.15 | 0.62  | 175.06 | Carbohydrates                    | #####     | #####     | #####     | #####     | #####     | #####     | #####     | #####     | #####     |
| Com_24_neg  | dATP                                         | C10H14N5Na2O12P3 | 535.15 | 0.62  | 549.00 | Nucleotide And Its Derivates     | 67,910    | 56,970    | 32,420    | 576,600   | 601,200   | 538,800   | 185,900   | 177,100   | 183,600   |
| Com_616_pos | D-beta-Homophenylalanine                     | C10H13NO2        | 179.22 | 1.19  | 180.10 | Amino Acid And Its Derivatives   | 67,450    | 39,870    | 17,750    | 95,420    | 55,730    | 80,600    | 60,870    | 39,800    | 44,360    |
| Com_42_neg  | Dehydrodiisoeugenol                          | 20H22O4          | 326.39 | 5.44  | 325.15 | Phenols                          | 191,900   | 7,153     | 20,280    | 25,064    | 22,671    | 24,856    | 23,020    | 21,230    | 19,030    |
| Com_742_pos | delta-Aminolevulinic acid hydrochloride      | C5H10ClNO3       | 167.59 | 1.17  | 162.10 | Carbohydrates                    | 806,300   | 2,089,000 | 1,833,000 | 333,400   | 286,700   | 297,600   | 548,200   | 551,000   | 504,100   |
| Com_736_pos | Dendrobine                                   | C16H25NO2        | 263.38 | 18.28 | 264.20 | Alkaloids                        | 8,990     | 5,688     | 6,454     | 8,484     | 6,654     | 6,671     | 7,682     | 7,268     | 8,269     |
| Com_358_pos | Denin                                        | C33H56O14        | 676.79 | 13.46 | 694.40 | Flavonoids                       | 12,840    | 14,850    | 3,444     | 71,070    | 65,390    | 59,220    | 54,930    | 57,040    | 48,550    |
| Com_359_pos | Deoxyadenosine                               | C10H13N5O3       | 251.24 | 9.28  | 252.00 | Nucleotide And Its Derivates     | 36,220    | 9,115     | 9,273     | 27,080    | 29,214    | 27,582    | 5,447     | 3,737     | 6,850     |
| Com_357_pos | Deoxyguanosine                               | C10H13N5O4       | 267.24 | 0.99  | 268.10 | Nucleotide And Its Derivates     | 378,800   | 211,600   | 193,300   | 150,600   | 123,500   | 117,900   | 227,800   | 187,400   | 141,000   |



|             |                                    |               |         |        |                              |                                  |           |           |           |           |           |           |           |           |           |
|-------------|------------------------------------|---------------|---------|--------|------------------------------|----------------------------------|-----------|-----------|-----------|-----------|-----------|-----------|-----------|-----------|-----------|
| Com_231_neg | deoxyribose-phosphate              |               | 0.65    | 213.00 | Nucleotide And Its Derivates | 10,180                           | 4,342     | 4,379     | 3,250     | 1,968     | 6,404     | 13,900    | 16,270    | 20,240    |           |
| Com_230_neg | D-Erythrose 4-phosphate            | C4H9O7P       | 200.08  | 0.61   | 199.00                       | Carbohydrates                    | 65,190    | 30,930    | 30,670    | 79,690    | 76,770    | 91,750    | 54,750    | 37,800    | 55,650    |
| Com_229_neg | D-Fructose 1,6-bisphosphate        | C6H14O12P2    | 340.12  | 0.50   | 338.99                       | Carbohydrates                    | 171,100   | 179,200   | 123,100   | 119,200   | 117,400   | 104,500   | 312,200   | 327,900   | 332,000   |
| Com_174_neg | D-Fructose 6-phosphate             | C6H13O9P      | 260.03  | 0.64   | 259.00                       | Carbohydrates                    | 531,900   | 162,400   | 210,500   | 156,100   | 126,300   | 114,600   | 228,100   | 254,900   | 233,800   |
| Com_139_neg | dGDP                               | C10H15N5O10P2 | 427.20  | 0.68   | 426.00                       | Nucleotide And Its Derivates     | 32,590    | 24,530    | 19,010    | 31,530    | 14,030    | 22,240    | 24,210    | 14,970    | 17,700    |
| Com_141_neg | D-Gluconic acid                    | C6H12O7       | 196.16  | 0.63   | 195.10                       | Carbohydrates                    | 170,100   | 119,000   | 45,330    | 236,200   | 196,300   | 206,400   | 104,300   | 111,100   | 101,500   |
| Com_415_pos | D-Glucosamine                      | C6H13NO5      | 179.17  | 0.63   | 180.00                       | Carbohydrates                    | 1,687,000 | 218,400   | 108,600   | 280,100   | 277,700   | 381,500   | 862,800   | 645,600   | 509,000   |
| Com_28_neg  | D-Glucose                          | C6H12O6       | 180.16  | 0.79   | 179.06                       | Carbohydrates                    | 1,004,000 | 867,200   | 936,800   | 1,746,000 | 1,870,000 | 1,838,000 | 955,300   | 928,500   | 961,900   |
| Com_129_neg | D-Glucose 1-phosphate              | C6H13O9P      | 260.14  | 0.65   | 259.01                       | Carbohydrates                    | 343,800   | 448,100   | 510,500   | 181,700   | 109,000   | 167,200   | 187,500   | 282,400   | 289,500   |
| Com_158_neg | D-Glucose 6-phosphate              | C6H13O9P      | 260.14  | 0.63   | 259.00                       | Carbohydrates                    | 2,493,000 | 711,200   | 1,388,000 | 442,800   | 486,700   | 465,400   | 456,500   | 523,800   | 517,800   |
| Com_143_neg | D-Glucuronic acid                  | C6H10O7       | 194.14  | 0.54   | 193.00                       | Carbohydrates                    | 824,000   | 1,332,000 | 3,063,000 | 992,000   | 989,300   | 1,137,000 | 724,000   | 686,500   | 741,400   |
| Com_142_neg | D-Glutamic acid                    | C5H9NO4       | 147.13  | 0.73   | 148.07                       | Amino Acid And Its Derivatives   | 72,840    | 170,800   | 84,880    | 39,590    | 47,970    | 60,060    | 45,310    | 39,410    | 34,380    |
| Com_669_pos | D-Glutamine                        | C5H10N2O3     | 146.15  | 0.65   | 147.10                       | Amino Acid And Its Derivatives   | #####     | #####     | #####     | #####     | #####     | #####     | #####     | #####     | #####     |
| Com_140_neg | dGMP                               | C10H14N5O7P   | 347.22  | 0.68   | 346.10                       | Nucleotide And Its Derivates     | 131,400   | 274,200   | 222,100   | 313,800   | 345,200   | 187,300   | 206,300   | 260,900   | 265,900   |
| Com_362_pos | di-C,C-hexosyl-apigenin            | C27H30O15     | 594.52  | 4.28   | 595.17                       | Flavonoids                       | 6,377,000 | 509,900   | 316,100   | 788,600   | 727,300   | 759,800   | 4,884,000 | 5,306,000 | 5,664,000 |
| Com_360_pos | di-C,C-hexosyl-apigenin derivative | C27H30O15     | 594.52  | 5.02   | 595.17                       | Flavonoids                       | 131,200   | 13,550    | 108,500   | 40,300    | 28,370    | 33,010    | 123,300   | 92,310    | 97,080    |
| Com_361_pos | di-C,C-hexosyl-methylchalcone      | C28H32O16     | 624.54  | 4.59   | 625.18                       | Flavonoids                       | 979,700   | 342,200   | 201,400   | 1,936,000 | 1,753,000 | 1,773,000 | 732,500   | 793,300   | 905,100   |
| Com_477_pos | Diethanolamine                     | C4H11NO2      | 105.14  | 0.73   | 106.00                       | Amino Acid And Its Derivatives   | 229,800   | 859,300   | 861,400   | 178,400   | 143,100   | 179,700   | 378,300   | 335,000   | 355,500   |
| Com_202_neg | Dihydrodehydrodiconiferyl Alcohol  | C20H24O6      | 360.40  | 14.14  | 359.15                       | Others                           | 19,830    | 1,392     | 6,468     | 4,670     | 2,232     | 5,085     | 11,910    | 11,160    | 13,640    |
| Com_537_pos | Diosgenin                          | C27H42O3      | 414.62  | 13.04  | 414.90                       | Terpenoids                       | 1,805,000 | 7,435,000 | 7,431,000 | 1,423,000 | 1,509,000 | 1,560,000 | 2,225,000 | 2,663,000 | 2,603,000 |
| Com_538_pos | Diosmetin                          | C16H12O6      | 300.26  | 8.55   | 301.07                       | Flavonoids                       | 91,330    | 16,260    | 47,680    | 148,100   | 125,000   | 131,300   | 36,740    | 40,310    | 42,400    |
| Com_91_neg  | Dipsacoside B                      | C53H86O22     | 1075.24 | 9.26   | 1045.14                      | Terpenoids                       | 889,100   | 20,570    | 14,850    | 135,300   | 123,100   | 124,700   | 187,500   | 195,400   | 212,300   |
| Com_539_pos | DL-2-Aminooctanoic Acid            | C8H17NO2      | 159.23  | 0.74   | 160.10                       | Organic Acid And Its Derivatives | 1,936,000 | 1,194,000 | 1,011,000 | 2,193,000 | 1,880,000 | 1,873,000 | 1,114,000 | 1,109,000 | 1,004,000 |
| Com_252_neg | DL-Glyceroluenylacetylphosphate    | C3H7O6P       | 170.00  | 0.62   | 169.00                       | Others                           | 3,245     | 3,569     | 3,155     | 3,175     | 4,428     | 7,600     | 4,369     | 3,172     | 2,780     |
| Com_639_pos | DL-Pipecolinic acid                | C6H11NO2      | 129.16  | 0.75   | 140.15                       | Organic Acid And Its Derivatives | #####     | #####     | #####     | #####     | #####     | #####     | #####     | #####     | #####     |
| Com_541_pos | DL-threo-beta-Methylaspartic acid  | C5H9NO4       | 147.13  | 0.74   | 148.10                       | Amino Acid And Its Derivatives   | 14,530    | 29,060    | 19,840    | 10,970    | 5,285     | 10,540    | 17,300    | 11,710    | 13,480    |
| Com_154_neg | D-Malic acid                       | C4H6O5        | 134.09  | 0.63   | 133.01                       | Organic Acid And Its Derivatives | #####     | #####     | #####     | #####     | #####     | #####     | #####     | #####     | #####     |
| Com_90_neg  | D-Mannose 6-phosphate              | C6H13O9P      | 260.14  | 0.53   | 259.00                       | Carbohydrates                    | 653,700   | 158,500   | 291,100   | 163,100   | 138,300   | 160,600   | 130,600   | 140,800   | 121,300   |
| Com_535_pos | D-Methionine                       | C5H11NO2S     | 149.21  | 0.91   | 150.10                       | Amino Acid And Its Derivatives   | 8,800     | 4,012,000 | 5,037,000 | 258,600   | 203,900   | 240,100   | 588,200   | 520,400   | 384,600   |

|             |                                               |               |        |       |        |                                  |           |           |           |           |           |           |           |           |           |
|-------------|-----------------------------------------------|---------------|--------|-------|--------|----------------------------------|-----------|-----------|-----------|-----------|-----------|-----------|-----------|-----------|-----------|
| Com_536_pos | D-Norvaline                                   | C5H11NO2      | 117.15 | 0.90  | 118.00 | Amino Acid And Its Derivatives   | #####     | #####     | #####     | #####     | #####     | #####     | #####     | #####     | #####     |
| Com_250_neg | Docetaxel                                     | C43H53NO14    | 807.88 | 0.69  | 852.35 | Terpenoids                       | 3,595     | 6,819     | 5,237     | 2,322     | 1,963     | 2,440     | 5,100     | 2,416     | 3,386     |
| Com_667_pos | D-Proline                                     | C5H9NO2       | 115.13 | 0.79  | 116.00 | Amino Acid And Its Derivatives   | #####     | #####     | #####     | 8,630,000 | 8,081,000 | 8,014,000 | #####     | #####     | #####     |
| Com_666_pos | Dracorhodin perochlorate                      | C17H15ClO7    | 366.75 | 8.60  | 367.06 | Others                           | 199,700   | 19,410    | 5,172     | 95,490    | 94,510    | 102,200   | 54,210    | 55,780    | 54,700    |
| Com_234_neg | D-Ribulose 5-phosphate                        | C5H11O8P      | 230.02 | 0.60  | 229.02 | Carbohydrates                    | 135,200   | 65,500    | 64,050    | 47,190    | 53,210    | 86,590    | 85,430    | 62,550    | 84,870    |
| Com_94_neg  | D-Scuoneptulose 1-/-                          | C7H13BaO10P   | 425.47 | 0.52  | 389.03 | Carbohydrates                    | 211,000   | 103,000   | 100,700   | 125,200   | 153,300   | 274,800   | 114,500   | 112,200   | 123,200   |
| Com_232_neg | D-Scuoneptulose 1-/-                          |               |        | 0.62  | 289.00 | Carbohydrates                    | 159,500   | 105,100   | 96,060    | 231,300   | 182,900   | 210,100   | 121,500   | 99,400    | 126,700   |
| Com_665_pos | D-Sorbitol                                    | C6H14O6       | 182.17 | 0.61  | 183.00 | Carbohydrates                    | 55,070    | 28,610    | 16,530    | 85,130    | 82,280    | 82,800    | 68,710    | 48,380    | 44,580    |
| Com_92_neg  | D-Tagatose                                    | C6H12O6       | 180.16 | 0.62  | 179.06 | Carbohydrates                    | 900,400   | 716,200   | 499,800   | 2,177,000 | 2,285,000 | 2,243,000 | 1,011,000 | 891,500   | 1,066,000 |
| Com_674_pos | dUDP                                          | C9H14N2O11P2  | 388.16 | 11.75 | 388.10 | Nucleotide And Its Derivates     | 299,200   | 2,231,000 | 2,211,000 | 304,700   | 298,000   | 277,800   | 386,000   | 510,000   | 490,400   |
| Com_93_neg  | Dulcitol                                      | C6H14O6       | 182.17 | 0.69  | 181.07 | Carbohydrates                    | 940,200   | 300,700   | 40,160    | 145,000   | 192,600   | 241,600   | 1,157,000 | 1,017,000 | 2,238,000 |
| Com_61_neg  | D-Xylonic acid                                | C5H10O6       | 166.05 | 0.69  | 165.05 | Organic Acid And Its Derivatives | 4,360,000 | 1,517,000 | 1,948,000 | 7,126,000 | 7,583,000 | 8,250,000 | 4,045,000 | 3,784,000 | 3,583,000 |
| Com_97_neg  | D-Xylose                                      | C5H10O5       | 150.13 | 0.72  | 149.05 | Carbohydrates                    | 226,000   | 192,100   | 179,800   | 759,100   | 872,200   | 789,000   | 399,800   | 365,300   | 386,100   |
| Com_98_neg  | D-Xylulose                                    | C5H10O5       | 150.13 | 0.72  | 149.03 | Carbohydrates                    | 184,000   | 129,700   | 133,400   | 501,600   | 523,600   | 495,900   | 454,900   | 398,400   | 404,300   |
| Com_34_neg  | D-Xylulose 5-phosphate                        | C5H11O8P      | 230.11 | 0.70  | 265.00 | Carbohydrates                    | 21,490    | 20,000    | 34,920    | 26,190    | 23,710    | 20,300    | 24,480    | 10,850    | 17,020    |
| Com_48_neg  | E-3,4,5'-Trihydroxy-3'-glucopyranosylstilbene |               |        | 10.70 | 405.10 | Others                           | 63,350    | 21,670    | 39,320    | 61,490    | 61,580    | 57,650    | 158,200   | 144,200   | 154,800   |
| Com_57_neg  | Ellagic acid                                  | C14H6O8       | 302.19 | 3.41  | 301.00 | Phenols                          | 304,900   | 15,560    | 19,260    | 37,700    | 37,980    | 37,960    | 55,030    | 53,960    | 57,170    |
| Com_49_neg  | Engeletin                                     | C21H22O10     | 434.39 | 7.16  | 433.11 | Flavonoids                       | 50,280    | 6,679     | 16,710    | 21,754    | 21,061    | 21,476    | 12,020    | 16,860    | 16,410    |
| Com_730_pos | Epigioitrin                                   | C5H7NOS       | 129.18 | 0.77  | 130.03 | Others                           | 2,581,000 | 3,387,000 | 2,352,000 | 2,376,000 | 2,188,000 | 2,114,000 | 3,861,000 | 3,067,000 | 2,899,000 |
| Com_469_pos | epsilon-Viniferin                             | C28H22O6      | 454.47 | 9.86  | 455.15 | Others                           | 26,847    | 10,475    | 6,780     | 47,150    | 47,270    | 41,500    | 5,506     | 9,430     | 8,019     |
| Com_296_neg | Eriodictyol                                   | C15H12O6      | 288.25 | 7.73  | 287.06 | Flavonoids                       | 13,110    | 26,659    | 26,860    | 92,540    | 78,410    | 86,040    | 32,520    | 25,840    | 28,700    |
| Com_297_neg | Erucic acid                                   | C22H42O2      | 338.57 | 20.25 | 337.31 | Lipids                           | #####     | #####     | #####     | #####     | #####     | #####     | #####     | #####     | #####     |
| Com_295_neg | Esculin hydrate                               | C15H16O9      | 340.28 | 3.68  | 339.07 | Phenylpropanoids                 | 558,800   | 144,700   | 87,480    | 87,100    | 92,320    | 99,980    | 66,170    | 78,250    | 86,600    |
| Com_526_pos | Ethyl ferulate                                | C12H14O4      | 222.24 | 29.31 | 223.10 | Phenols                          | 138,800   | 138,200   | 153,700   | 150,900   | 117,400   | 131,100   | 181,000   | 153,800   | 138,600   |
| Com_427_pos | Ferulic Acid                                  | C10H10O4      | 194.18 | 3.41  | 195.06 | Phenols                          | 1,966,000 | 242,700   | 114,000   | 736,200   | 682,400   | 713,100   | 281,400   | 324,800   | 311,000   |
| Com_735_pos | Feruloylputrescine                            | C14H20N2O3    | 264.32 | 3.39  | 265.16 | Phenols                          | 47,090    | 35,050    | 24,860    | 95,750    | 80,970    | 77,950    | 131,800   | 93,230    | 137,900   |
| Com_167_neg | Flavin Adenine Dinucleotide                   | C27H33N9O15P2 | 785.55 | 5.76  | 784.20 | Nucleotide And Its Derivates     | 6,750     | 9,972     | 4,896     | 41,700    | 36,510    | 39,060    | 17,800    | 22,030    | 25,250    |
| Com_166_neg | Formononetin                                  | C16H12O4      | 268.26 | 11.40 | 267.00 | Flavonoids                       | 13,494    | 7,618     | 6,800     | 2,408     | 2,440     | 2,361     | 2,802     | 2,100     | 2,701     |
| Com_128_neg | Fructose                                      | C6H12O6       | 180.06 | 0.74  | 178.80 | Carbohydrates                    | 2,983,000 | 521,700   | 513,200   | 2,331,000 | 2,505,000 | 2,090,000 | 1,351,000 | 1,199,000 | 1,219,000 |
| Com_71_neg  | Fumaric Acid                                  | C4H4O4        | 116.07 | 0.56  | 115.00 | Organic Acid And Its Derivatives | 940,300   | 454,200   | 327,900   | 1,814,000 | 1,594,000 | 1,878,000 | 1,082,000 | 758,000   | 765,700   |
| Com_510_pos | Fustin                                        | C15H12O6      | 288.25 | 4.90  | 289.00 | Flavonoids                       | 134,700   | 101,000   | 100,700   | 76,833    | 75,003    | 67,998    | 32,990    | 25,240    | 25,910    |
| Com_70_neg  | GA7-1                                         |               |        | 11.37 | 329.10 | Organic Acid And Its Derivatives | 2,568,000 | 204,700   | 275,200   | 205,100   | 184,600   | 183,000   | 968,500   | 1,050,000 | 1,065,000 |
| Com_239_neg | Gallocatechin-catechin                        |               | 594.10 | 8.44  | 593.10 | Organic Acid And Its Derivatives | 19,620    | 59,680    | 25,040    | 64,890    | 60,770    | 63,010    | 18,180    | 23,350    | 24,040    |

|             |                                                                             |               |        |       |        |                                  |           |           |           |           |           |           |           |           |           |
|-------------|-----------------------------------------------------------------------------|---------------|--------|-------|--------|----------------------------------|-----------|-----------|-----------|-----------|-----------|-----------|-----------|-----------|-----------|
| Com_465_pos | gamma-Aminobutyric acid                                                     | C4H9NO2       | 103.12 | 0.69  | 104.10 | Organic Acid And Its Derivatives | 675,500   | 1,506,000 | 1,040,000 | 1,231,000 | 1,100,000 | 1,209,000 | 952,000   | 806,900   | 840,100   |
| Com_721_pos | gamma-Dodecalactone                                                         | C12H22O2      | 198.30 | 1.47  | 199.20 | Others                           | 119,000   | 36,124    | 37,793    | 17,260    | 23,570    | 12,000    | 20,700    | 21,940    | 20,960    |
| Com_281_neg | GDP-alpha-D-glucose                                                         | C16H25N5O16P2 | 637.34 | 0.66  | 626.05 | Nucleotide And Its Derivates     | 38,516    | 7,934     | 5,814     | 12,520    | 10,340    | 13,620    | 14,780    | 6,980     | 5,311     |
| Com_520_pos | GDP-L-fucose                                                                | C16H25N5O15P2 | 589.34 | 0.80  | 590.09 | Nucleotide And Its Derivates     | 16,800    | 337       | 1,694     | 11,220    | 9,148     | 4,386     | 11,610    | 7,133     | 7,889     |
| Com_456_pos | Gentiobiose                                                                 | C12H22O11     | 342.30 | 0.60  | 365.10 | Carbohydrates                    | 213,500   | 77,890    | 78,230    | 119,200   | 108,300   | 141,000   | 98,560    | 90,020    | 81,780    |
| Com_413_pos | Germacrone;(5E,7E)-5,7-dimethyl-10-propan-2-ylidenecyclodeca-3,7-dien-1-one | C15H22O       | 218.34 | 14.93 | 219.17 | Others                           | 22,410    | 14,994    | 19,939    | 33,048    | 34,096    | 31,947    | 12,950    | 13,110    | 8,974     |
| Com_260_neg | Ginsenoside C-K                                                             | C36H62O8      | 622.87 | 0.76  | 667.44 | Terpenoids                       | 22,800    | 12,370    | 9,425     | 10,640    | 5,944     | 7,315     | 6,232     | 5,538     | 8,930     |
| Com_258_neg | Glucosylvitexin                                                             | C27H30O15     | 594.52 | 4.84  | 593.15 | Flavonoids                       | 1,512,000 | 123,100   | 78,380    | 221,500   | 206,600   | 229,000   | 1,972,000 | 2,114,000 | 2,184,000 |
| Com_414_pos | Glu-Glu                                                                     | C10H14N2O7    | 276.24 | 0.82  | 277.10 | Amino Acid And Its Derivatives   | 65,010    | 19,180    | 17,860    | 48,460    | 37,040    | 45,620    | 34,710    | 37,130    | 42,200    |
| Com_282_neg | Glycitin                                                                    | C22H22O10     | 446.40 | 8.24  | 445.10 | Flavonoids                       | 16,070    | 73,564    | 46,509    | 32,770    | 33,490    | 31,740    | 98,970    | 107,200   | 104,100   |
| Com_733_pos | Glycyl-L-Leucine                                                            | C8H16N2O3     | 188.22 | 1.30  | 189.10 | Amino Acid And Its Derivatives   | 320,400   | 82,610    | 65,880    | 114,300   | 112,800   | 129,800   | 159,600   | 141,900   | 119,300   |
| Com_284_neg | GMP                                                                         | C10H14N5O8P   | 363.22 | 0.62  | 362.10 | Nucleotide And Its Derivates     | 44,650    | 33,520    | 28,510    | 27,640    | 28,450    | 25,940    | 35,250    | 25,910    | 34,280    |
| Com_283_neg | Guanidinoethyl Sulfonate                                                    | C3H9N3O3S     | 167.19 | 0.72  | 166.03 | Organic Acid And Its Derivatives | 149,600   | 7,653     | 7,252     | 19,170    | 8,405     | 11,720    | 70,280    | 69,730    | 45,830    |
| Com_475_pos | Guanosine                                                                   | C10H13N5O5    | 283.24 | 0.91  | 284.10 | Nucleotide And Its Derivates     | 501,000   | 307,700   | 252,700   | 387,900   | 258,500   | 285,600   | 232,500   | 221,900   | 242,300   |
| Com_519_pos | Guanosine 3',5'-Cyclic Monophosphate                                        | C10H12N5O7P   | 345.21 | 0.89  | 346.05 | Nucleotide And Its Derivates     | 92,290    | 64,970    | 90,260    | 153,400   | 118,800   | 146,500   | 47,880    | 55,660    | 38,560    |
| Com_161_neg | Guanosine 5'-triphosphate                                                   | C10H16N5O14P3 | 523.18 | 0.68  | 522.00 | Nucleotide And Its Derivates     | 12,230    | 7,515     | 7,115     | 2,513     | 5,197     | 8,524     | 4,805     | 4,125     | 4,735     |
| Com_190_neg | Helicid                                                                     | C13H16O7      | 284.26 | 9.88  | 283.08 | Phenols                          | 10,334    | 5,520     | 4,777     | 2,457     | 6,876     | 7,895     | 2,764     | 2,941     | 1,035     |
| Com_191_neg | Heptamethoxyflavone                                                         | C22H24O9      | 432.42 | 5.00  | 431.10 | Flavonoids                       | 25,447    | 5,865     | 4,988     | 5,560     | 8,109     | 3,993     | 8,641     | 5,683     | 5,068     |
| Com_518_pos | Hesperetin 5-O-glucoside                                                    | C22H24O11     | 464.42 | 6.52  | 465.10 | Flavonoids                       | 1,337,000 | 4,836,000 | 2,314,000 | 360,600   | 304,200   | 316,100   | 499,400   | 538,300   | 570,800   |
| Com_264_neg | Hesperidin                                                                  | C28H34O15     | 610.19 | 7.50  | 609.19 | Flavonoids                       | 1,038,000 | 2,750,000 | 3,560,000 | 157,300   | 122,500   | 130,900   | 473,600   | 481,500   | 525,700   |
| Com_422_pos | Hippuric Acid                                                               | C9H9NO3       | 179.17 | 2.87  | 180.10 | Amino Acid And Its Derivatives   | 82,750    | 19,820    | 16,000    | 45,880    | 47,080    | 47,400    | 33,090    | 40,510    | 33,470    |
| Com_426_pos | Histamine                                                                   | C5H9N3        | 111.15 | 0.79  | 112.10 | Amino Acid And Its Derivatives   | 1,965,000 | 654,700   | 561,200   | 754,200   | 721,500   | 726,300   | 1,000,000 | 907,600   | 857,900   |
| Com_423_pos | Histidine                                                                   | C6H9N3O2      | 155.16 | 0.61  | 156.08 | Amino Acid And Its Derivatives   | 257,700   | 1,479,000 | 1,178,000 | 574,600   | 475,800   | 550,900   | 483,000   | 467,500   | 385,900   |
| Com_302_neg | Homocysteine                                                                | C4H9NO2S      | 134.19 | 0.70  | 133.90 | Amino Acid And Its Derivatives   | 70,630    | 82,020    | 3,948     | 108,300   | 322,000   | 190,200   | 26,880    | 20,940    | 12,250    |
| Com_192_neg | Homogentisic Acid                                                           | C8H8O4        | 168.15 | 0.84  | 167.10 | Organic Acid And Its Derivatives | 61,790    | 31,760    | 10,590    | 56,330    | 70,540    | 57,310    | 22,140    | 18,410    | 20,370    |

|             |                                          |             |        |       |        |                                  |           |           |           |           |           |           |           |           |           |
|-------------|------------------------------------------|-------------|--------|-------|--------|----------------------------------|-----------|-----------|-----------|-----------|-----------|-----------|-----------|-----------|-----------|
| Com_430_pos | Hordenine                                | C10H15NO    | 165.23 | 1.61  | 166.12 | Alkaloids                        | #####     | #####     | #####     | 5,201,000 | 4,846,000 | 4,606,000 | #####     | #####     | #####     |
| Com_189_neg | Hydroxycitric acid                       | C6H8O8      | 208.12 | 0.63  | 207.02 | Organic Acid And Its Derivatives | 160,500   | 55,750    | 60,070    | 138,500   | 136,900   | 130,700   | 105,700   | 86,090    | 96,470    |
| Com_399_pos | Hypoxanthine                             | C5H4N4O     | 136.11 | 7.63  | 137.00 | Nucleotide And Its Derivates     | 42,120    | 50,970    | 53,870    | 43,000    | 37,450    | 41,100    | 57,660    | 32,740    | 47,470    |
| Com_715_pos | Hypoxanthine-9-β-D-Arabinofuranoside     | C10H12N4O5  | 268.23 | 0.83  | 269.10 | Nucleotide And Its Derivates     | 7,226,000 | 4,737,000 | 3,514,000 | 4,075,000 | 3,978,000 | 4,136,000 | 2,491,000 | 3,247,000 | 2,793,000 |
| Com_716_pos | IAA-Asp                                  |             |        | 4.81  | 291.30 | Amino Acid And Its Derivatives   | 13,010    | 4,610     | 7,552     | 15,760    | 17,260    | 22,360    | 18,880    | 16,640    | 26,690    |
| Com_714_pos | IAA-Glu                                  |             |        | 0.56  | 305.10 | Amino Acid And Its Derivatives   | 68,660    | 37,550    | 33,180    | 112,000   | 122,600   | 130,600   | 65,200    | 80,970    | 84,920    |
| Com_632_pos | IBA                                      | C12H13NO2   | 203.24 | 8.18  | 204.10 | Amino Acid And Its Derivatives   | 52,080    | 7,821     | 6,727     | 13,860    | 22,164    | 19,820    | 12,330    | 30,040    | 23,710    |
| Com_392_pos | Indole-3-acetic acid                     | C10H9NO2    | 175.18 | 5.66  | 176.07 | Amino Acid And Its Derivatives   | 177,600   | 93,350    | 86,230    | 30,390    | 47,440    | 62,170    | 41,880    | 62,610    | 64,050    |
| Com_542_pos | Indole-3-Carboxaldehyde                  | C9H7NO      | 145.16 | 2.64  | 146.10 | Amino Acid And Its Derivatives   | 247,300   | 1,236,000 | 1,072,000 | 281,100   | 250,600   | 259,400   | 278,000   | 310,500   | 275,100   |
| Com_590_pos | Indole-3-carboxylic acid                 | C9H7NO2     | 161.16 | 5.87  | 162.15 | Alkaloids                        | 31,450    | 20,000    | 19,640    | 13,990    | 12,830    | 11,870    | 48,680    | 52,780    | 35,180    |
| Com_26_neg  | Indole-5-carboxylic acid                 | C9H7NO2     | 161.05 | 0.90  | 160.05 | Amino Acid And Its Derivatives   | 89,330    | 116,000   | 79,240    | 55,260    | 50,720    | 56,060    | 45,030    | 22,240    | 37,240    |
| Com_589_pos | Inosine-5'-monophosphate                 | C10H13N4O8P | 348.21 | 0.78  | 349.10 | Nucleotide And Its Derivates     | 71,630    | 217,000   | 146,300   | 186,500   | 182,100   | 93,330    | 95,490    | 143,300   | 139,900   |
| Com_25_neg  | Inositol                                 | C6H12O6     | 180.16 | 0.72  | 179.16 | Carbohydrates                    | 1,052,000 | 2,571,000 | 815,700   | 3,782,000 | 4,651,000 | 4,900,000 | 2,246,000 | 2,250,000 | 2,291,000 |
| Com_69_neg  | Isoacteoside                             | C29H36O15   | 624.59 | 8.66  | 623.20 | Phenylpropanoids                 | 165,700   | 41,280    | 137,400   | 40,070    | 31,960    | 34,250    | 30,440    | 18,430    | 30,750    |
| Com_80_neg  | IsochlorogenicacidC                      | C25H24O12   | 516.46 | 0.90  | 515.12 | Phenols                          | 772,700   | 5,809,000 | 3,841,000 | 2,165,000 | 1,718,000 | 2,327,000 | 1,931,000 | 1,692,000 | 2,033,000 |
| Com_68_neg  | Isocitrate                               | C6H8O7      | 192.12 | 0.48  | 191.00 | Organic Acid And Its Derivatives | #####     | 3,692,000 | 3,794,000 | #####     | #####     | #####     | 8,623,000 | 7,219,000 | 8,615,000 |
| Com_113_neg | isomacronuiatol-1-O-β-D-glucoside        | C23H28O10   | 464.46 | 6.52  | 463.16 | Flavonoids                       | #####     | #####     | #####     | 3,695,000 | 3,301,000 | 3,099,000 | 5,580,000 | 5,408,000 | 4,990,000 |
| Com_726_pos | Isoorientin                              | C21H20O11   | 448.38 | 5.24  | 449.11 | Flavonoids                       | 2,070,000 | 112,600   | 140,300   | 350,500   | 328,400   | 339,000   | 322,500   | 361,300   | 353,800   |
| Com_110_neg | Isorhamnetin                             | C16H12O7    | 316.26 | 10.02 | 315.05 | Flavonoids                       | 12,700    | 32,078    | 5,778     | 466,700   | 405,200   | 449,700   | 79,660    | 79,860    | 79,850    |
| Com_109_neg | Isorhoifolin                             | C27H30O14   | 578.52 | 9.29  | 577.10 | Flavonoids                       | 11,180    | 24,390    | 35,990    | 50,320    | 48,280    | 37,410    | 14,540    | 17,040    | 19,280    |
| Com_576_pos | Isorhynchophylline                       | C22H28N2O4  | 384.47 | 7.46  | 385.21 | Alkaloids                        | 67,500    | 13,771    | 1,350     | 61,980    | 43,110    | 58,870    | 20,830    | 22,670    | 20,440    |
| Com_108_neg | Isoschaftoside                           | C26H28O14   | 564.49 | 5.43  | 563.14 | Flavonoids                       | 855,500   | 209,000   | 55,800    | 448,900   | 374,800   | 413,700   | 684,200   | 704,300   | 734,200   |
| Com_397_pos | Isotanshinone IIA                        | C19H18O3    | 294.34 | 15.10 | 295.10 | Others                           | 379,600   | 70,030    | 104,700   | 141,800   | 120,700   | 123,000   | 261,000   | 286,200   | 273,100   |
| Com_148_neg | Isotrifoliin                             | C21H20O12   | 464.10 | 7.40  | 463.00 | Flavonoids                       | #####     | #####     | #####     | 3,919,000 | 3,204,000 | 2,943,000 | 7,638,000 | 4,783,000 | 4,899,000 |
| Com_214_neg | Isovitexin                               | C21H20O10   | 432.38 | 6.93  | 431.10 | Flavonoids                       | #####     | 2,761,000 | #####     | 3,049,000 | 2,993,000 | 2,680,000 | #####     | #####     | #####     |
| Com_215_neg | JA-Ile                                   |             |        | 11.79 | 322.10 | Organic Acid And Its Derivatives | 127,500   | 365,400   | 162,800   | 162,400   | 152,300   | 153,900   | 271,100   | 249,200   | 243,200   |
| Com_212_neg | Kaempferide                              | C16H12O6    | 300.26 | 12.80 | 299.00 | Flavonoids                       | 102,900   | 16,940    | 3,007     | #####     | #####     | #####     | 955,900   | 1,017,000 | 1,026,000 |
| Com_130_neg | Kaempferin                               | C21H20O10   | 432.11 | 9.13  | 431.00 | Flavonoids                       | 18,950    | 14,310    | 8,419     | 26,160    | 26,080    | 24,980    | 9,265     | 7,545     | 7,766     |
| Com_461_pos | Kaempferitrin                            | C27H30O14   | 578.52 | 5.84  | 579.17 | Flavonoids                       | 47,970    | 8,264     | 24,423    | 52,040    | 38,500    | 37,120    | 89,620    | 72,110    | 69,980    |
| Com_355_pos | Kaempferol 3-O-glucoside-2'-O-rhamnoside |             |        | 5.29  | 595.30 | Flavonoids                       | 949,100   | 1,607,000 | 642,400   | 116,700   | 165,500   | 136,600   | 209,000   | 188,900   | 184,300   |

|             |                                         |             |        |       |        |                                  |           |           |           |           |           |           |           |           |           |
|-------------|-----------------------------------------|-------------|--------|-------|--------|----------------------------------|-----------|-----------|-----------|-----------|-----------|-----------|-----------|-----------|-----------|
| Com_157_neg | Kaempferol 3-O-robinobioside (Biorobin) | C27H30O15   | 594.52 | 8.46  | 593.16 | Flavonoids                       | 569,800   | 2,098,000 | 979,600   | 3,009,000 | 2,632,000 | 2,633,000 | 714,200   | 781,800   | 838,000   |
| Com_607_pos | Kaempferol-3-O-rutinoside               | C27H30O15   | 594.52 | 5.49  | 595.17 | Flavonoids                       | 96,380    | 107,071   | 106,232   | 217,100   | 223,000   | 237,900   | 92,360    | 59,390    | 78,950    |
| Com_354_pos | Kaempferol7-O-β-D-glucopyranoside       | C21H20O11   | 448.38 | 5.49  | 449.11 | Flavonoids                       | 1,258,000 | 1,629,000 | 730,300   | 242,400   | 243,800   | 263,000   | 259,900   | 286,300   | 238,700   |
| Com_14_neg  | Kaji-Ichigoside F1                      | C36H58O10   | 650.84 | 6.97  | 649.40 | Others                           | 878,100   | 555,600   | 938,000   | 24,897    | 23,818    | 24,343    | 90,760    | 76,040    | 91,230    |
| Com_15_neg  | Kinsenoside                             | C10H16O8    | 264.23 | 0.89  | 309.08 | Others                           | 331,700   | 308,400   | 247,100   | 784,600   | 917,900   | 747,700   | 482,900   | 527,800   | 492,000   |
| Com_662_pos | Kolavic acid                            | C20H30O4    | 334.45 | 14.54 | 335.22 | Terpenoids                       | 9,379     | 6,545     | 2,717     | 7,842     | 12,980    | 17,690    | 14,670    | 10,890    | 10,880    |
| Com_33_neg  | Kynurenic acid                          | C10H7NO3    | 189.17 | 4.52  | 188.04 | Organic Acid And Its Derivatives | 122,200   | 15,480    | 6,503     | 12,240    | 9,902     | 9,788     | 49,430    | 29,120    | 64,740    |
| Com_138_neg | Kynurenic acid O-hexside                | C16H17NO8   | 351.10 | 2.74  | 350.10 | Organic Acid And Its Derivatives | 15,601    | 7,959     | 7,610     | 9,392     | 9,665     | 9,571     | 4,300     | 4,276     | 5,544     |
| Com_12_neg  | L-3-Phenyllactic Acid                   | C9H10O3     | 166.17 | 0.74  | 165.10 | Organic Acid And Its Derivatives | 72,920    | 17,890    | 34,550    | 68,550    | 84,570    | 90,000    | 47,640    | 34,370    | 41,150    |
| Com_125_neg | Lactic acid                             | C3H6O3      | 90.08  | 0.72  | 89.00  | Organic Acid And Its Derivatives | 21,980    | 3,562     | 2,776     | 15,460    | 33,250    | 34,820    | 6,740     | 5,975     | 2,764     |
| Com_10_neg  | Lactobionic acid                        | C12H22O12   | 358.30 | 0.59  | 357.10 | Carbohydrates                    | #####     | #####     | #####     | #####     | #####     | #####     | #####     | #####     | #####     |
| Com_731_pos | lactucopicrin                           | C23H22O7    | 410.42 | 12.20 | 411.14 | Others                           | 5,771     | 14,340    | 8,632     | 3,950     | 6,778     | 4,655     | 16,640    | 11,980    | 21,600    |
| Com_660_pos | L-Alanine                               | C3H7NO2     | 89.09  | 0.81  | 90.00  | Amino Acid And Its Derivatives   | 3,037,000 | 4,653,000 | 1,839,000 | 1,816,000 | 1,613,000 | 1,626,000 | 2,136,000 | 2,147,000 | 1,880,000 |
| Com_64_neg  | L-Arabinose                             | C5H10O5     | 150.05 | 0.71  | 149.00 | Carbohydrates                    | 677,900   | 531,100   | 441,100   | 2,378,000 | 2,731,000 | 2,757,000 | 1,081,000 | 1,152,000 | 1,180,000 |
| Com_88_neg  | L-Arabitol                              | C5H12O5     | 152.15 | 0.71  | 151.06 | Carbohydrates                    | 270,500   | 44,420    | 20,240    | 78,500    | 100,100   | 89,330    | 393,900   | 263,700   | 271,700   |
| Com_11_neg  | L-Arginine                              | C6H14N4O2   | 174.20 | 0.75  | 173.10 | Amino Acid And Its Derivatives   | 13,190    | 8,527     | 6,041     | 10,460    | 19,730    | 8,885     | 8,442     | 4,826     | 5,233     |
| Com_314_neg | L-Argininosuccinate                     | C10H18N4O6  | 290.27 | 0.57  | 289.10 | Organic Acid And Its Derivatives | 162,600   | 97,010    | 120,000   | 165,600   | 105,800   | 172,200   | 117,400   | 171,400   | 107,700   |
| Com_107_neg | Laricitrin                              | C16H12O8    | 332.26 | 1.70  | 331.00 | Flavonoids                       | 3,355,000 | 228,600   | 247,100   | 2,604,000 | 2,853,000 | 2,542,000 | 1,072,000 | 1,140,000 | 1,181,000 |
| Com_661_pos | L-Ascorbate                             | C6H8O6      | 176.12 | 12.28 | 177.00 | Terpenoids                       | 2,328,000 | 2,306,000 | 2,238,000 | 2,136,000 | 2,087,000 | 2,134,000 | 2,006,000 | 2,346,000 | 2,019,000 |
| Com_658_pos | L-Asparagine                            | C4H8N2O3    | 132.12 | 0.77  | 133.00 | Amino Acid And Its Derivatives   | 7,149,000 | #####     | #####     | 3,133,000 | 2,972,000 | 2,842,000 | #####     | #####     | #####     |
| Com_664_pos | L-Citrulline                            | C6H13N3O3   | 175.19 | 0.74  | 176.10 | Amino Acid And Its Derivatives   | 125,300   | 599,100   | 318,400   | 469,200   | 421,700   | 462,400   | 387,900   | 356,200   | 351,900   |
| Com_533_pos | L-Cystine                               | C6H12N2O4S2 | 240.30 | 1.06  | 241.00 | Amino Acid And Its Derivatives   | 1,564,000 | 1,291,000 | 923,500   | 3,538,000 | 3,014,000 | 3,056,000 | 1,717,000 | 1,450,000 | 1,476,000 |
| Com_534_pos | Levistilide A                           | C24H28O4    | 380.48 | 15.87 | 381.21 | Terpenoids                       | 10,670    | 10,170    | 16,260    | 13,230    | 14,690    | 17,830    | 7,480     | 11,430    | 12,660    |
| Com_634_pos | Levodopa                                | C9H11NO4    | 197.19 | 0.78  | 198.10 | Alkaloids                        | 491,700   | 9,327,000 | 7,368,000 | 340,100   | 393,800   | 426,400   | 1,481,000 | 1,158,000 | 1,294,000 |
| Com_7_neg   | L-Fucose                                | C6H12O5     | 164.07 | 0.83  | 163.00 | Carbohydrates                    | 40,880    | 23,910    | 26,030    | 44,130    | 61,460    | 58,810    | 26,440    | 31,640    | 28,820    |
| Com_531_pos | L-Glutamate                             | C5H9NO4     | 147.13 | 0.81  | 148.10 | Amino Acid And Its Derivatives   | 7,320,000 | #####     | #####     | 4,302,000 | 3,869,000 | 4,073,000 | #####     | 9,871,000 | 9,833,000 |
| Com_6_neg   | L-Guanoic acid gamma-lactone            | C6H10O6     | 178.05 | 0.78  | 177.14 | Carbohydrates                    | 30,920    | 5,231     | 7,256     | 18,820    | 19,290    | 27,980    | 10,180    | 15,040    | 8,167     |
| Com_424_pos | L-Homocarnosine                         | C10H16N4O3  | 240.26 | 0.64  | 241.30 | Amino Acid And Its Derivatives   | 587,800   | 318,900   | 220,300   | 1,071,000 | 1,114,000 | 1,260,000 | 415,600   | 578,200   | 545,600   |

|             |                        |             |        |       |        |                                  |           |           |           |           |           |           |           |           |           |
|-------------|------------------------|-------------|--------|-------|--------|----------------------------------|-----------|-----------|-----------|-----------|-----------|-----------|-----------|-----------|-----------|
| Com_425_pos | L-Homocystine          | C8H16N2O4S2 | 268.35 | 0.90  | 269.00 | Amino Acid And Its Derivatives   | 4,857,000 | 3,548,000 | 2,445,000 | 2,874,000 | 2,868,000 | 3,064,000 | 1,881,000 | 2,455,000 | 2,154,000 |
| Com_177_neg | L-Homoserine           | C4H9NO3     | 119.06 | 0.73  | 118.10 | Amino Acid And Its Derivatives   | 16,390    | 15,980    | 19,580    | 4,009     | 4,008     | 5,606     | 15,580    | 8,800     | 5,605     |
| Com_349_pos | Linthospermic Acid +Na | C27H22O12   | 538.46 | 6.98  | 561.10 | Phenols                          | 8,729     | 23,340    | 21,860    | 69,940    | 58,130    | 51,960    | 17,090    | 28,040    | 23,740    |
| Com_577_pos | Lipoamide              | C8H15NOS2   | 205.34 | 2.57  | 206.20 | Amino Acid And Its Derivatives   | 173,000   | 861,600   | 694,100   | 188,900   | 170,200   | 172,300   | 176,600   | 190,700   | 204,300   |
| Com_352_pos | L-Isoleucine           | C6H13NO2    | 131.17 | 1.23  | 132.00 | Amino Acid And Its Derivatives   | #####     | #####     | #####     | #####     | #####     | #####     | #####     | #####     | #####     |
| Com_351_pos | L-Leucine              | C6H13NO2    | 131.17 | 1.23  | 132.10 | Amino Acid And Its Derivatives   | #####     | #####     | #####     | #####     | #####     | #####     | #####     | #####     | #####     |
| Com_511_pos | L-Methionine sulfone   | C5H11NO4S   | 181.21 | 0.78  | 182.00 | Amino Acid And Its Derivatives   | 266,000   | 898,700   | 846,700   | 157,200   | 158,900   | 138,400   | 267,400   | 263,700   | 280,900   |
| Com_470_pos | L-Mimosine             | C8H10N2O4   | 198.18 | 0.71  | 199.07 | Lipids                           | 49,000    | 17,640    | 7,257     | 24,560    | 41,930    | 37,730    | 15,100    | 20,390    | 18,140    |
| Com_163_neg | Lonicerin              | C27H30O15   | 594.52 | 7.67  | 593.15 | Flavonoids                       | 5,231,000 | 7,679,000 | 4,984,000 | 869,100   | 869,300   | 862,200   | 1,428,000 | 1,502,000 | 1,486,000 |
| Com_471_pos | L-Ornithine            | C5H13ClN2O2 | 132.16 | 0.70  | 133.00 | Amino Acid And Its Derivatives   | 528,200   | 1,263,000 | 1,158,000 | 279,600   | 203,600   | 204,500   | 880,200   | 799,600   | 872,000   |
| Com_473_pos | LPC(1-acyl 16:0)       | C24H50NO7P  | 495.63 | 15.06 | 496.34 | Lipids                           | 193,100   | 351,200   | 649,600   | 1,368,000 | 1,204,000 | 1,272,000 | 61,210    | 75,790    | 63,310    |
| Com_472_pos | LPC(1-acyl 16:1)       | C24H48NO7P  | 493.61 | 14.12 | 494.32 | Lipids                           | 39,020    | 10,040    | 3,743     | 17,580    | 14,670    | 11,400    | 9,906     | 11,060    | 10,010    |
| Com_474_pos | LPC(1-acyl 18:1)       | C26H52NO7P  | 521.67 | 15.29 | 522.36 | Lipids                           | 36,950    | 52,170    | 22,810    | 107,300   | 106,600   | 52,830    | 120,200   | 139,100   | 126,100   |
| Com_464_pos | LPC(1-acyl 18:2)       | C26H50NO7P  | 519.65 | 14.52 | 520.34 | Lipids                           | 1,063,000 | 636,500   | 480,900   | 3,002,000 | 2,773,000 | 2,230,000 | 928,800   | 1,018,000 | 965,900   |
| Com_651_pos | L-Phenylalanine        | C9H11NO2    | 165.19 | 1.53  | 166.10 | Amino Acid And Its Derivatives   | #####     | #####     | #####     | #####     | #####     | #####     | #####     | #####     | #####     |
| Com_587_pos | L-Pipecolate           | C6H11NO2    | 129.16 | 0.73  | 130.00 | Amino Acid And Its Derivatives   | #####     | #####     | #####     | 8,053,000 | 6,993,000 | 7,146,000 | #####     | #####     | #####     |
| Com_67_neg  | L-Saccharopine         | C11H20N2O6  | 276.13 | 0.72  | 275.00 | Amino Acid And Its Derivatives   | 1,824,000 | 1,645,000 | 1,915,000 | 2,096,000 | 2,095,000 | 1,995,000 | 1,874,000 | 1,830,000 | 2,000,000 |
| Com_584_pos | L-Serine               | C3H7NO3     | 105.09 | 0.81  | 106.00 | Amino Acid And Its Derivatives   | 2,843,000 | 7,425,000 | 8,489,000 | 1,594,000 | 1,501,000 | 1,514,000 | 3,529,000 | 3,555,000 | 3,255,000 |
| Com_63_neg  | L-Tartaric acid        | C4H6O6      | 150.02 | 0.64  | 149.00 | Organic Acid And Its Derivatives | 146,400   | 102,000   | 69,630    | 472,600   | 458,700   | 502,700   | 199,100   | 194,700   | 206,500   |
| Com_585_pos | L-Theanine             | C7H14N2O3   | 174.20 | 0.72  | 175.11 | Amino Acid And Its Derivatives   | 730,400   | 2,129,000 | 1,337,000 | 1,138,000 | 1,039,000 | 1,062,000 | 1,428,000 | 1,288,000 | 1,122,000 |
| Com_586_pos | L-Tryptophan           | C11H12N2O2  | 204.23 | 2.67  | 205.10 | Amino Acid And Its Derivatives   | #####     | #####     | #####     | #####     | #####     | #####     | #####     | #####     | #####     |
| Com_287_neg | L-Tyrosine             | C9H11NO3    | 181.19 | 1.31  | 180.00 | Amino Acid And Its Derivatives   | 1,138,000 | 2,154,000 | 1,821,000 | 191,100   | 387,400   | 181,900   | 372,500   | 260,900   | 281,200   |
| Com_165_neg | Lumichrome             | C12H10N4O2  | 242.23 | 10.00 | 241.07 | Alkaloids                        | 24,750    | 56,510    | 32,360    | 456,700   | 384,900   | 381,700   | 185,200   | 162,500   | 109,700   |
| Com_31_neg  | Luteolin 7-O-glucoside | C21H20O11   | 448.38 | 8.51  | 447.09 | Flavonoids                       | 167,600   | 160,500   | 151,300   | 23,240    | 16,530    | 23,000    | 43,960    | 41,660    | 45,990    |
| Com_713_pos | L-Valine               | C5H11NO2    | 117.15 | 0.79  | 118.09 | Amino Acid And Its Derivatives   | 1,437,000 | 4,573,000 | 4,380,000 | 553,900   | 482,500   | 509,500   | 1,278,000 | 1,343,000 | 1,172,000 |

|             |                                      |             |        |       |        |                                  |           |           |           |           |           |           |           |           |           |
|-------------|--------------------------------------|-------------|--------|-------|--------|----------------------------------|-----------|-----------|-----------|-----------|-----------|-----------|-----------|-----------|-----------|
| Com_555_pos | Lycoperodine                         | C12H12N2O2  | 216.24 | 3.75  | 217.20 | Amino Acid And Its Derivatives   | #####     | 7,842,000 | 4,596,000 | #####     | 8,763,000 | 9,154,000 | #####     | #####     | #####     |
| Com_298_neg | LysoPA 18:0 (2n isomer)              | C21H35O7P   | 438.27 | 0.81  | 437.27 | Lipids                           | 19,880    | 22,320    | 24,130    | 21,660    | 11,750    | 12,800    | 23,300    | 16,860    | 10,130    |
| Com_156_neg | Malate                               | C4H6O5      | 134.09 | 0.63  | 133.00 | Organic Acid And Its Derivatives | #####     | #####     | #####     | #####     | #####     | #####     | #####     | #####     | #####     |
| Com_89_neg  | Malic acid                           | C4H6O5      | 134.09 | 0.56  | 133.00 | Organic Acid And Its Derivatives | #####     | 9,733,000 | 2,731,000 | #####     | #####     | #####     | #####     | #####     | #####     |
| Com_259_neg | Malonicacid                          | C3H4O4      | 104.06 | 0.57  | 103.00 | Organic Acid And Its Derivatives | 123,400   | 8,324     | 7,525     | 13,090    | 10,690    | 13,310    | 21,400    | 12,280    | 6,348     |
| Com_722_pos | Maltitol                             | C12H24O11   | 344.31 | 0.71  | 345.14 | Carbohydrates                    | 187,600   | 90,650    | 89,790    | 190,400   | 159,100   | 156,700   | 101,200   | 102,900   | 91,830    |
| Com_137_neg | Maltotetraose                        | C24H42O21   | 666.10 | 0.87  | 665.10 | Carbohydrates                    | 43,480    | 20,906    | 19,689    | 34,020    | 58,920    | 40,760    | 11,040    | 11,330    | 5,736     |
| Com_723_pos | Maltotriitol                         | C18H34O16   | 506.45 | 0.71  | 529.18 | Carbohydrates                    | 314,900   | 319,200   | 404,800   | 260,200   | 287,900   | 243,200   | 258,600   | 203,700   | 231,900   |
| Com_36_neg  | Maslinic acid                        | C30H48O4    | 472.70 | 16.26 | 471.30 | Terpenoids                       | 844,500   | 166,800   | 242,105   | 732,100   | 564,500   | 388,700   | 389,100   | 405,100   | 394,600   |
| Com_727_pos | Matairesinol                         | C20H22O6    | 358.39 | 6.92  | 359.15 | Phenols                          | 27,250    | 6,653     | 1,079     | 31,741    | 27,767    | 26,629    | 22,410    | 15,890    | 21,930    |
| Com_670_pos | Melezitose                           | C18H32O16   | 504.44 | 0.72  | 527.16 | Carbohydrates                    | 4,334,000 | 7,891,000 | #####     | 4,402,000 | 5,007,000 | 4,009,000 | 4,563,000 | 4,031,000 | 4,413,000 |
| Com_506_pos | Methional                            | C4H8OS      | 104.17 | 0.77  | 105.00 | Others                           | 1,717,000 | 1,613,000 | 2,038,000 | 1,153,000 | 1,043,000 | 1,116,000 | 1,184,000 | 1,038,000 | 986,100   |
| Com_420_pos | Methyl arachidonate                  | C21H34O2    | 318.49 | 19.58 | 319.26 | Lipids                           | 9,871     | 9,355     | 12,360    | 7,754     | 9,137     | 9,260     | 10,770    | 9,327     | 9,345     |
| Com_530_pos | Methyl cinnamate                     | C10H10O2    | 162.19 | 9.88  | 163.07 | Phenylpropanoids                 | 87,946    | 34,886    | 37,639    | 262,000   | 266,000   | 287,000   | 53,740    | 57,150    | 34,820    |
| Com_176_neg | Methyl indole-3-acetate              | C11H11NO2   | 189.08 | 0.70  | 188.10 | Amino Acid And Its Derivatives   | 116,800   | 54,770    | 71,520    | 98,750    | 102,700   | 95,440    | 102,800   | 90,700    | 119,400   |
| Com_532_pos | Methyl linoleate                     | C19H33O2    | 294.47 | 15.28 | 295.26 | Lipids                           | 523,500   | 106,200   | 120,200   | 180,800   | 174,200   | 197,300   | 354,900   | 414,200   | 411,100   |
| Com_419_pos | methylApigenin C-hexoside            | C22H22O10   | 446.40 | 6.52  | 447.13 | Flavonoids                       | 39,133    | 9,243     | 2,575     | 49,456    | 52,237    | 47,273    | 11,410    | 26,420    | 24,800    |
| Com_418_pos | methylApigenin C-pentoside           | C21H20O9    | 416.38 | 6.27  | 417.12 | Flavonoids                       | 100,800   | 4,592     | 11,680    | 77,433    | 75,876    | 71,520    | 20,850    | 15,590    | 33,930    |
| Com_44_neg  | Methylenesuccinic acid               | C5H6O4      | 130.10 | 0.62  | 131.00 | Lipids                           | 26,060    | 10,750    | 10,220    | 4,711     | 3,626     | 6,278     | 5,142     | 9,484     | 11,020    |
| Com_46_neg  | Methylmalonic Acid                   | C4H6O4      | 118.09 | 0.56  | 117.00 | Organic Acid And Its Derivatives | 410,100   | 68,120    | 37,860    | 403,400   | 547,700   | 362,600   | 98,920    | 77,370    | 48,670    |
| Com_657_pos | methylQuercetin O-hexoside           |             |        | 6.08  | 479.00 | Flavonoids                       | #####     | #####     | 9,023,000 | 1,080,000 | 988,700   | 978,200   | 2,479,000 | 3,220,000 | 2,784,000 |
| Com_1_neg   | Mevalonic acid                       | C6H12O4     | 148.16 | 0.75  | 147.10 | Organic Acid And Its Derivatives | 436,400   | 86,490    | 131,800   | 635,600   | 645,900   | 667,500   | 317,300   | 246,500   | 268,400   |
| Com_624_pos | Miltirone                            | C19H22O2    | 282.38 | 15.96 | 283.10 | Others                           | 8,722     | 11,050    | 11,290    | 6,234     | 9,674     | 15,150    | 21,950    | 11,410    | 19,720    |
| Com_609_pos | Miyabenol C                          | C42H32O9    | 680.70 | 0.75  | 681.21 | Phenols                          | 25,750    | 4,619     | 8,514     | 19,060    | 9,876     | 12,920    | 9,197     | 18,370    | 10,990    |
| Com_219_neg | Morin hydrate                        | C15H12O8    | 320.25 | 7.25  | 301.04 | Flavonoids                       | 292,700   | 208,500   | 132,900   | 31,890    | 27,490    | 24,870    | 34,620    | 38,420    | 40,000    |
| Com_655_pos | Muscone                              | C16H30O     | 238.41 | 18.81 | 239.24 | Others                           | 476,600   | 437,500   | 453,500   | 393,100   | 534,100   | 419,200   | 529,800   | 479,100   | 418,300   |
| Com_146_neg | Myricitrin                           | C21H20O12   | 464.38 | 6.86  | 463.09 | Flavonoids                       | #####     | #####     | #####     | 7,908,000 | 7,647,000 | 6,916,000 | #####     | #####     | #####     |
| Com_145_neg | Myrtillin chloride                   | C21H21ClO12 | 500.84 | 9.08  | 481.10 | Flavonoids                       | 15,016    | 10,196    | 6,562     | 8,259     | 9,767     | 10,368    | 2,195     | 3,507     | 3,746     |
| Com_480_pos | N- Feruloylcadaverine                |             |        | 14.94 | 279.00 | Amino Acid And Its Derivatives   | 1,232,000 | 212,600   | 256,000   | 455,000   | 405,100   | 489,600   | 665,900   | 709,700   | 634,200   |
| Com_428_pos | N-(L-Hydroxyethyl)iminodiacetic acid | C6H11NO5    | 177.16 | 0.81  | 178.07 | Organic Acid And Its Derivatives | 3,518,000 | 2,179,000 | 1,770,000 | 1,084,000 | 937,500   | 976,700   | 1,794,000 | 1,816,000 | 1,903,000 |
| Com_240_neg | N-(3-Indolylacetyl)-L-Alanine        | C13H14N2O3  | 246.26 | 5.95  | 267.07 | Amino Acid And Its Derivatives   | 25,210    | 7,963     | 15,700    | 18,150    | 21,340    | 13,980    | 35,010    | 15,060    | 22,470    |
| Com_641_pos | N-(9H-Purin-6-ylcarbamoyl)threonine  | C10H12N6O4  | 280.24 | 17.02 | 281.10 | Nucleotide And Its Derivates     | 13,570    | 27,920    | 44,640    | 13,520    | 14,290    | 12,140    | 11,960    | 10,070    | 8,504     |

|             |                                                     |             |        |        |                                |                                  |           |           |           |           |           |           |           |           |           |
|-------------|-----------------------------------------------------|-------------|--------|--------|--------------------------------|----------------------------------|-----------|-----------|-----------|-----------|-----------|-----------|-----------|-----------|-----------|
| Com_640_pos | N', N', N'-DiFeruloyl,Sinapoylspermidine            |             | 17.31  | 704.10 | Phenols                        | 5,590                            | 6,366     | 8,804     | 4,142     | 6,891     | 4,171     | 6,687     | 4,062     | 7,740     |           |
| Com_642_pos | N', N'', N'''-Di-p-hydroxybenxoyl, feruloylagmatine |             | 17.30  | 548.10 | Amino Acid And Its Derivatives | 2,195                            | 3,969     | 2,146     | 3,374     | 3,110     | 2,721     | 1,503     | 2,863     | 2,682     |           |
| Com_643_pos | N', N'',N'''-Triferuloylagmatine                    |             | 17.32  | 660.00 | Amino Acid And Its Derivatives | 5,907                            | 6,957     | 4,439     | 4,647     | 5,151     | 5,089     | 4,560     | 4,048     | 5,592     |           |
| Com_644_pos | N', N'',N'''-Tri-p-cinnamoylagmatine                |             | 4.45   | 522.00 | Amino Acid And Its Derivatives | 59,820                           | 4,355     | 2,758     | 57,870    | 40,610    | 68,160    | 19,340    | 19,050    | 15,940    |           |
| Com_341_pos | N', N''-Dicafeoylspermidine                         |             | 24.25  | 471.00 | Amino Acid And Its Derivatives | 11,400                           | 9,248     | 10,190    | 14,710    | 10,120    | 9,974     | 9,939     | 13,180    | 12,690    |           |
| Com_343_pos | N', N''-DiFeruloylagamntine-N-arabinoside           |             | 17.37  | 615.00 | Phenols                        | 39,670                           | 42,960    | 39,290    | 35,330    | 33,680    | 34,570    | 49,880    | 45,650    | 32,710    |           |
| Com_342_pos | N', N''-DiFeruloylspermidine                        | C27H35N3O6  | 497.58 | 15.75  | 498.26                         | Phenols                          | 13,870    | 11,670    | 12,090    | 19,790    | 13,510    | 25,100    | 19,550    | 15,890    | 19,460    |
| Com_610_pos | N', N''-DiSinapoylspermidine                        | C29H39N3O8  | 557.63 | 4.72   | 558.28                         | Phenols                          | 7,490     | 6,306     | 14,647    | 62,450    | 70,880    | 50,570    | 18,180    | 21,370    | 19,620    |
| Com_710_pos | N', N''-Feruloyl, Caffeoylspermidine                | C26H33N3O6  | 483.56 | 0.65   | 485.00                         | Amino Acid And Its Derivatives   | 13,240    | 14,470    | 6,822     | 12,900    | 10,320    | 27,190    | 5,553     | 7,782     | 3,527     |
| Com_102_neg | N-[(Tert-butoxy)carbonyl]-L-tryptophan              | C16H20N2O4  | 304.34 | 10.27  | 303.13                         | Amino Acid And Its Derivatives   | 25,980    | 1,540     | 1,182     | 5,584     | 2,796     | 3,556     | 3,728     | 3,471     | 3,266     |
| Com_369_pos | N1-Acetylsperrmine                                  | C12H28N4O   | 244.38 | 1.13   | 245.20                         | Organic Acid And Its Derivatives | 61,350    | 31,520    | 35,420    | 34,070    | 41,050    | 20,540    | 69,170    | 58,810    | 50,820    |
| Com_623_pos | N2, N2-Dimethylguanosine                            | C12H17N5O5  | 311.29 | 1.59   | 312.13                         | Nucleotide And Its Derivates     | 2,318,000 | 1,236,000 | 1,128,000 | 550,000   | 476,600   | 419,700   | 542,800   | 536,100   | 580,000   |
| Com_371_pos | N2-Methylguanosine                                  | C11H15N5O5  | 297.27 | 1.07   | 298.20                         | Nucleotide And Its Derivates     | 180,200   | 124,000   | 124,700   | 41,710    | 41,900    | 38,840    | 50,990    | 76,030    | 28,130    |
| Com_457_pos | N6,N6-dimethyladenine                               | C7H9N5      | 163.18 | 0.63   | 164.10                         | Nucleotide And Its Derivates     | 1,250,000 | 713,300   | 327,700   | 1,366,000 | 1,008,000 | 1,137,000 | 746,500   | 863,500   | 867,600   |
| Com_370_pos | N6-Acetyl-L-Lysine                                  | C8H16N2O3   | 188.22 | 0.76   | 189.12                         | Amino Acid And Its Derivatives   | 368,200   | 556,700   | 698,600   | 138,700   | 121,200   | 122,500   | 474,600   | 387,800   | 363,500   |
| Com_686_pos | N6-Succinyl Adenosine                               | C14H17N5O8  | 383.31 | 1.27   | 384.12                         | Nucleotide And Its Derivates     | 3,399,000 | 2,193,000 | 769,000   | 2,452,000 | 2,094,000 | 2,044,000 | 2,297,000 | 2,540,000 | 2,557,000 |
| Com_85_neg  | N7-Methylguanosine                                  | C11H17N5O5  | 298.28 | 3.90   | 296.10                         | Nucleotide And Its Derivates     | 378,600   | 254,700   | 325,000   | 82,470    | 86,880    | 84,230    | 122,000   | 135,700   | 131,200   |
| Com_687_pos | N8-Acetylsperrmidine                                | C9H23Cl2N3O | 260.20 | 0.65   | 188.18                         | Amino Acid And Its Derivatives   | 753,900   | 114,400   | 94,600    | 172,500   | 183,900   | 148,900   | 195,300   | 150,900   | 162,300   |
| Com_101_neg | N-Acetylaspertate                                   | C6H9NO5     | 175.14 | 0.59   | 174.04                         | Amino Acid And Its Derivatives   | 511,900   | 198,500   | 167,000   | 54,640    | 53,530    | 62,040    | 190,700   | 208,100   | 190,700   |
| Com_100_neg | N-Acetylasparylglutamic acid                        | C11H16N2O8  | 304.25 | 2.55   | 303.10                         | Organic Acid And Its Derivatives | 1,550     | 463       | 1,063     | 8,723     | 7,773     | 7,406     | 4,170     | 4,266     | 3,598     |
| Com_299_neg | N-Acetyl-D-Glucosamine                              | C8H15NO6    | 221.21 | 0.78   | 220.08                         | Carbohydrates                    | 65,892    | 67,354    | 55,000    | 10,870    | 5,151     | 2,929     | 25,090    | 13,970    | 17,440    |
| Com_689_pos | N-Acetyl-Dl-glutamic acid                           | C7H11NO5    | 189.17 | 0.61   | 190.07                         | Amino Acid And Its Derivatives   | 824,000   | 624,600   | 419,600   | 1,607,000 | 1,248,000 | 1,268,000 | 1,013,000 | 1,234,000 | 859,900   |



|             |                                  |              |        |       |        |                                |           |           |           |           |           |           |           |           |           |
|-------------|----------------------------------|--------------|--------|-------|--------|--------------------------------|-----------|-----------|-----------|-----------|-----------|-----------|-----------|-----------|-----------|
| Com_688_pos | N-Acetyl-D-tryptophan            | C13H14N2O3   | 246.26 | 5.53  | 247.11 | Amino Acid And Its Derivatives | 59,700    | 73,360    | 70,140    | 201,700   | 197,000   | 151,400   | 133,500   | 167,000   | 139,200   |
| Com_52_neg  | N-acetylglycine                  | C4H7NO3      | 117.10 | 0.70  | 116.00 | Amino Acid And Its Derivatives | 41,090    | 84,490    | 66,130    | 5,597     | 7,178     | 8,767     | 23,160    | 16,770    | 12,750    |
| Com_685_pos | N-Acetyl-L-aspartic acid         | C6H9NO5      | 175.14 | 5.81  | 176.07 | Amino Acid And Its Derivatives | 56,550    | 30,520    | 10,810    | 49,070    | 21,960    | 23,630    | 36,960    | 30,310    | 19,080    |
| Com_185_neg | N-Acetyl-L-glutamic acid         | C7H11NO5     | 189.17 | 0.67  | 188.10 | Amino Acid And Its Derivatives | 62,130    | 17,520    | 17,350    | 41,320    | 46,840    | 51,300    | 60,430    | 54,920    | 68,400    |
| Com_690_pos | N-Acetyl-L-histidine             | C8H11N3O3    | 197.19 | 0.74  | 198.09 | Amino Acid And Its Derivatives | 322,900   | 117,500   | 74,720    | 182,700   | 202,300   | 189,000   | 158,800   | 214,100   | 193,500   |
| Com_691_pos | N-Acetyl-L-leucine               | C8H15NO3     | 173.21 | 4.59  | 174.11 | Amino Acid And Its Derivatives | 98,720    | 20,570    | 36,596    | 21,490    | 41,250    | 48,070    | 60,630    | 55,640    | 51,050    |
| Com_599_pos | N-Acetyl-L-Tyrosine              | C11H13NO4    | 223.23 | 2.56  | 224.09 | Amino Acid And Its Derivatives | 35,210    | 6,183     | 9,315     | 10,920    | 11,930    | 13,560    | 20,520    | 18,290    | 21,550    |
| Com_598_pos | N-Acetylneuraminic acid          | C11H19NO9    | 309.27 | 19.24 | 310.10 | Amino Acid And Its Derivatives | 143,400   | 132,500   | 159,700   | 144,400   | 123,000   | 170,400   | 172,500   | 144,900   | 132,400   |
| Com_597_pos | N-Acetylputrescine               | C6H14N2O     | 130.19 | 0.74  | 131.00 | Amino Acid And Its Derivatives | 151,300   | 33,710    | 32,700    | 108,200   | 73,500    | 84,880    | 78,660    | 97,010    | 93,500    |
| Com_603_pos | N-Acetylserotonin                | C12H14N2O2   | 218.25 | 7.16  | 219.00 | Amino Acid And Its Derivatives | 54,006    | 12,460    | 21,246    | 72,260    | 49,250    | 53,950    | 33,720    | 30,940    | 19,790    |
| Com_144_neg | N-Acetylthreonine                | C6H11NO4     | 161.16 | 0.78  | 160.00 | Amino Acid And Its Derivatives | 160,000   | 99,110    | 233,100   | 149,900   | 138,800   | 142,700   | 129,000   | 108,700   | 132,900   |
| Com_596_pos | N-Acetyltryptamine               | C12H14N2O    | 202.25 | 0.83  | 203.10 | Amino Acid And Its Derivatives | 180,600   | 119,800   | 30,770    | 222,600   | 188,500   | 206,200   | 240,900   | 198,300   | 224,000   |
| Com_380_pos | Nardosinone                      | C15H22O3     | 250.33 | 12.44 | 251.16 | Terpenoids                     | #####     | #####     | #####     | #####     | #####     | #####     | #####     | #####     | #####     |
| Com_19_neg  | Naringenin                       | C15H12O5     | 272.25 | 8.24  | 271.00 | Flavonoids                     | 10,480    | 16,820    | 22,390    | 45,890    | 39,870    | 39,050    | 16,830    | 13,420    | 8,560     |
| Com_594_pos | Naringerin                       | C15H12O5     | 272.25 | 7.80  | 273.08 | Flavonoids                     | 188,894   | 37,589    | 42,527    | 2,222,000 | 2,041,000 | 2,159,000 | 497,300   | 508,800   | 522,100   |
| Com_20_neg  | Naringin                         | C27H32O14    | 580.54 | 9.43  | 579.10 | Flavonoids                     | 36,290    | 108,100   | 23,611    | 13,660    | 11,150    | 9,655     | 19,530    | 23,230    | 20,620    |
| Com_21_neg  | Narirutin                        | C27H32O14    | 580.54 | 9.17  | 579.17 | Flavonoids                     | 43,580    | 111,500   | 12,940    | 11,640    | 12,740    | 13,040    | 20,990    | 15,870    | 19,150    |
| Com_482_pos | N-Coumaroyltyramine              | C17H17NO3    | 283.32 | 7.05  | 284.00 | Amino Acid And Its Derivatives | 2,246,000 | 9,739,000 | 400,200   | #####     | #####     | #####     | 8,975,000 | 9,209,000 | 8,671,000 |
| Com_444_pos | Neocryptotanshinone              | C19H22O4     | 314.38 | 13.23 | 315.20 | Others                         | 282,300   | 106,900   | 41,820    | 26,160    | 38,390    | 40,490    | 52,120    | 43,570    | 39,070    |
| Com_16_neg  | Neoeriocitrin                    | C27H32O15    | 596.53 | 8.31  | 595.17 | Flavonoids                     | 37,550    | 19,820    | 16,250    | 56,030    | 49,440    | 51,140    | 17,940    | 20,270    | 13,870    |
| Com_481_pos | Neotuberostemonine               | C22H33NO4    | 375.50 | 12.19 | 376.25 | Alkaloids                      | #####     | #####     | #####     | #####     | #####     | #####     | #####     | #####     | #####     |
| Com_479_pos | N-Feruloylagmatine               | C15H21N4O3   | 305.35 | 4.17  | 307.18 | Phenols                        | 11,350    | 13,180    | 6,921     | 10,590    | 11,730    | 9,428     | 22,330    | 11,490    | 7,912     |
| Com_734_pos | N-Feruloylserotonin              | C20H20N2O4   | 352.38 | 14.53 | 353.15 | Phenols                        | 21,050    | 22,740    | 7,697     | 47,790    | 44,210    | 49,400    | 38,650    | 36,500    | 42,230    |
| Com_738_pos | N-Feruloylspermidine derivative  |              |        | 16.05 | 500.50 | Phenols                        | 7,982     | 7,959     | 2,127     | 5,355     | 6,420     | 8,015     | 34,800    | 32,660    | 37,640    |
| Com_732_pos | N-Feruloyltyramine               | C18H19NO4    | 313.35 | 7.37  | 314.14 | Phenols                        | 4,350,000 | #####     | 1,175,000 | #####     | #####     | #####     | #####     | #####     | #####     |
| Com_740_pos | NG,NG-Dimethyl-L-arginine        | C8H20Cl2N4O2 | 202.25 | 0.80  | 203.00 | Amino Acid And Its Derivatives | 204,900   | 304,200   | 340,700   | 137,000   | 131,100   | 131,200   | 230,100   | 197,200   | 199,400   |
| Com_729_pos | N-hexosyl-p-coumaroyl putrescine |              |        | 7.75  | 397.10 | Phenols                        | 20,540    | 121,394   | 76,752    | 18,020    | 15,270    | 56,322    | 167,500   | 197,100   | 208,200   |

|             |                                                      |             |        |       |        |                                  |           |           |           |           |           |           |           |           |           |
|-------------|------------------------------------------------------|-------------|--------|-------|--------|----------------------------------|-----------|-----------|-----------|-----------|-----------|-----------|-----------|-----------|-----------|
| Com_741_pos | N-Hydroxy-L-tryptophan                               | C11H12N2O3  | 220.23 | 1.07  | 221.10 | Amino Acid And Its Derivatives   | 99,600    | 228,200   | 134,300   | 101,600   | 92,610    | 79,920    | 87,410    | 95,880    | 84,070    |
| Com_612_pos | Niacinamide                                          | C6H6N2O     | 122.13 | 0.84  | 123.10 | Terpenoids                       | 3,459,000 | 1,490,000 | 1,354,000 | 1,986,000 | 1,812,000 | 1,809,000 | 1,195,000 | 1,231,000 | 1,168,000 |
| Com_737_pos | Nicotianamine                                        | C12H21N3O6  | 303.31 | 0.79  | 304.15 | Others                           | 1,940,000 | 7,432,000 | 4,457,000 | 5,690,000 | 4,875,000 | 5,056,000 | 2,946,000 | 3,225,000 | 3,234,000 |
| Com_454_pos | Nicotinate ribonucleoside                            | C11H13NO6   | 255.22 | 0.76  | 256.20 | Others                           | 142,800   | 560,900   | 491,000   | 185,400   | 173,100   | 218,200   | 183,900   | 129,600   | 190,500   |
| Com_445_pos | Nicotinic Acid                                       | C6H5NO2     | 123.11 | 0.77  | 124.00 | Terpenoids                       | 1,892,000 | 1,727,000 | 1,537,000 | 1,038,000 | 881,400   | 892,500   | 1,198,000 | 1,215,000 | 1,079,000 |
| Com_443_pos | Nicotinuric Acid                                     | C8H8N2O3    | 180.16 | 9.67  | 181.10 | Terpenoids                       | 880,200   | 48,360    | 15,050    | 330,300   | 276,200   | 297,300   | 677,800   | 799,100   | 754,800   |
| Com_440_pos | N-Lauryldiethanolamine                               | C16H35NO2   | 273.46 | 0.60  | 275.10 | Others                           | 49,660    | 32,790    | 27,350    | 94,050    | 67,490    | 59,300    | 61,280    | 52,730    | 77,200    |
| Com_441_pos | Nobiletin                                            | C21H22O8    | 402.40 | 10.91 | 403.10 | Flavonoids                       | 43,570    | 28,590    | 57,050    | 50,360    | 58,110    | 45,580    | 47,770    | 38,190    | 33,880    |
| Com_648_pos | Nortanshinone                                        | C17H12O4    | 280.27 | 20.37 | 303.00 | Others                           | 248,900   | 242,100   | 255,900   | 253,400   | 248,500   | 263,700   | 290,100   | 256,200   | 256,800   |
| Com_552_pos | N-p-Cinnamoylputrescine                              | C13H18N2O   | 218.29 | 7.14  | 219.00 | Amino Acid And Its Derivatives   | 52,680    | 70,350    | 9,853     | 489,000   | 412,900   | 451,700   | 192,300   | 199,100   | 193,200   |
| Com_551_pos | N-p-Coumaroylagmatine                                | C14H20N4O2  | 276.33 | 15.30 | 277.17 | Phenols                          | 231,200   | 73,180    | 60,060    | 90,310    | 102,900   | 91,320    | 130,800   | 188,900   | 168,500   |
| Com_550_pos | N-p-Coumaroylputrescine derivative                   |             |        | 8.16  | 398.20 | Phenols                          | 102,300   | 4,545     | 8,316     | 15,390    | 8,392     | 21,920    | 20,340    | 34,320    | 29,150    |
| Com_553_pos | N-Sinapoylagmatine                                   | C16H24N4O4  | 336.39 | 18.28 | 337.19 | Phenols                          | 23,960    | 22,650    | 21,440    | 37,800    | 41,070    | 45,240    | 26,510    | 29,340    | 29,610    |
| Com_377_pos | Nuciferin                                            | C19H21NO2   | 295.38 | 10.78 | 296.17 | Alkaloids                        | 146,400   | 72,520    | 87,630    | 110,900   | 110,400   | 111,000   | 59,340    | 83,080    | 90,070    |
| Com_434_pos | N $\alpha$ -Acetyl-L-Arginine                        | C8H16N4O3   | 216.24 | 0.81  | 217.10 | Amino Acid And Its Derivatives   | 302,000   | 87,070    | 58,840    | 329,100   | 380,000   | 340,000   | 1,531,000 | 1,247,000 | 1,359,000 |
| Com_435_pos | N- $\Gamma$ -Acetyl-N-2-Formyl-5-Methoxykynurenamine | C13H16N2O4  | 264.28 | 5.73  | 265.10 | Organic Acid And Its Derivatives | 103,100   | 21,040    | 31,908    | 110,400   | 113,500   | 85,210    | 58,660    | 58,660    | 36,760    |
| Com_436_pos | O-Acetylserine                                       | C5H9NO4     | 147.13 | 0.76  | 148.06 | Amino Acid And Its Derivatives   | 9,026,000 | #####     | #####     | 5,400,000 | 5,195,000 | 4,757,000 | #####     | #####     | #####     |
| Com_432_pos | Oleic acid                                           | C18H34O2    | 282.46 | 18.28 | 283.27 | Lipids                           | 24,480    | 12,200    | 26,030    | 45,140    | 61,230    | 50,670    | 18,790    | 20,920    | 18,300    |
| Com_62_neg  | Ononin                                               | C22H22O9    | 430.13 | 0.73  | 429.13 | Flavonoids                       | 45,930    | 14,060    | 15,370    | 49,530    | 48,830    | 43,170    | 35,360    | 30,950    | 47,090    |
| Com_319_neg | O-p-coumaroyl-O-salicyloyl quinic acid               | C23H22O10   | 458.10 | 10.24 | 457.10 | Organic Acid And Its Derivatives | 175,300   | 71,990    | 24,300    | 2,185,000 | 1,998,000 | 2,039,000 | 951,700   | 1,028,000 | 985,600   |
| Com_462_pos | O-Phosphocholine                                     | C5H15ClNO4P | 219.60 | 0.77  | 184.00 | Others                           | 653,700   | 3,599,000 | 5,694,000 | 6,606,000 | 5,620,000 | 5,799,000 | 1,794,000 | 1,802,000 | 1,792,000 |
| Com_172_neg | O-Phosphorylethanolamine                             | C2H8NO4P    | 141.06 | 0.65  | 140.00 | Others                           | 46,130    | 128,400   | 199,100   | 32,510    | 60,380    | 63,840    | 37,430    | 36,490    | 39,360    |
| Com_173_neg | Orcinol glucosid                                     | C13H18O7    | 286.28 | 12.46 | 285.10 | Phenols                          | 114,100   | 130,400   | 166,800   | 105,900   | 120,300   | 109,000   | 166,200   | 142,800   | 121,200   |
| Com_170_neg | Orotidine                                            | C10H12N2O8  | 288.21 | 4.27  | 287.10 | Nucleotide And Its Derivates     | 144,200   | 90,860    | 53,230    | 31,610    | 40,220    | 34,490    | 71,570    | 54,060    | 65,640    |
| Com_463_pos | Oroxin B                                             | C27H30O15   | 594.52 | 4.44  | 595.17 | Flavonoids                       | 781,600   | 95,480    | 43,230    | 419,000   | 372,800   | 338,700   | 638,800   | 688,900   | 743,900   |
| Com_126_neg | Oxaloacetate                                         | C4H4O5      | 132.07 | 0.63  | 131.00 | Organic Acid And Its Derivatives | 963,700   | 606,700   | 472,400   | 510,600   | 575,000   | 562,900   | 478,300   | 469,300   | 537,700   |
| Com_692_pos | p-Aminobenzoate                                      | C7H7NO2     | 137.14 | 5.47  | 137.30 | Organic Acid And Its Derivatives | 210,347   | 123,175   | 68,081    | 153,476   | 153,581   | 145,022   | 79,070    | 67,100    | 90,530    |
| Com_346_pos | Panaxydol                                            | C17H24O2    | 260.37 | 17.44 | 261.19 | Lipids                           | 74,760    | 35,790    | 23,480    | 125,100   | 151,200   | 139,100   | 47,190    | 60,570    | 56,850    |
| Com_345_pos | p-Anisaldehyde                                       | C8H8O2      | 136.15 | 6.16  | 137.06 | Others                           | 484,100   | 462,100   | 69,990    | 694,400   | 611,000   | 582,700   | 337,900   | 334,800   | 274,400   |
| Com_668_pos | Pantothenate                                         | C9H17NO5    | 219.24 | 1.96  | 220.12 | Terpenoids                       | 1,736,000 | 1,739,000 | 1,315,000 | 1,691,000 | 1,413,000 | 1,416,000 | 818,400   | 1,094,000 | 1,062,000 |
| Com_60_neg  | Pantothenol                                          | C9H19NO4    | 205.13 | 0.90  | 204.13 | Lipids                           | 276,500   | 34,100    | 25,710    | 346,000   | 375,600   | 321,100   | 167,700   | 124,400   | 146,400   |
| Com_344_pos | Parthenolide                                         | C15H20O3    | 248.32 | 6.81  | 249.15 | Others                           | 1,370,000 | 317,900   | 175,100   | 350,500   | 283,100   | 296,500   | 520,500   | 538,800   | 507,400   |
| Com_498_pos | p-Coumaraldehyde                                     | C9H8O2      | 148.16 | 7.90  | 149.10 | Phenylpropanoids                 | 409,000   | 156,600   | 176,500   | 207,200   | 218,600   | 201,800   | 253,400   | 280,300   | 206,800   |

|             |                                   |             |        |       |        |                                  |           |           |           |           |           |           |           |           |           |
|-------------|-----------------------------------|-------------|--------|-------|--------|----------------------------------|-----------|-----------|-----------|-----------|-----------|-----------|-----------|-----------|-----------|
| Com_694_pos | p-Coumaric acid                   | C9H8O3      | 164.16 | 3.64  | 165.20 | Phenylpropanoids                 | #####     | #####     | #####     | 106,700   | 103,800   | 124,500   | 5,068,000 | 5,598,000 | 5,273,000 |
| Com_638_pos | p-Coumaroylagmatine               |             |        | 6.33  | 277.10 | Phenols                          | 26,330    | 8,591     | 2,796     | 8,014     | 9,930     | 5,053     | 12,770    | 28,930    | 17,360    |
| Com_321_pos | Phellodendrine chloride           | C20H24ClNO4 | 377.86 | 0.72  | 342.17 | Alkaloids                        | 46,650    | 29,950    | 37,730    | 24,700    | 32,540    | 28,220    | 19,760    | 40,240    | 23,600    |
| Com_496_pos | Phellodenol H                     | C17H20O9    | 368.34 | 4.13  | 369.12 | Phenols                          | 46,790    | 31,410    | 124,404   | 1,295,000 | 1,211,000 | 1,240,000 | 200,400   | 254,900   | 261,500   |
| Com_497_pos | Phellodenol H O-hexoside          |             |        | 4.91  | 531.50 | Phenols                          | 433,700   | 404,000   | 166,700   | 25,670    | 30,310    | 21,830    | 21,230    | 29,860    | 58,720    |
| Com_382_pos | Phenethylamine                    | C8H11N      | 121.18 | 2.66  | 122.10 | Amino Acid And Its Derivatives   | 604,100   | 256,100   | 171,700   | 705,400   | 579,900   | 596,200   | 404,900   | 446,100   | 417,800   |
| Com_365_pos | Phenylacetylglutamine             | C13H16N2O4  | 264.28 | 1.03  | 265.10 | Amino Acid And Its Derivatives   | 1,170,000 | 2,555,000 | 1,912,000 | 70,990    | 79,430    | 97,950    | 478,500   | 457,900   | 521,300   |
| Com_149_neg | Pheophorbide A                    | C35H36N4O5  | 592.68 | 18.58 | 591.26 | Organic Acid And Its Derivatives | 198,600   | 181,100   | 77,440    | 150,600   | 135,600   | 103,000   | 44,030    | 68,960    | 68,930    |
| Com_582_pos | Phe-Phe                           | C18H20N2O3  | 312.36 | 4.92  | 313.15 | Amino Acid And Its Derivatives   | 7,581     | 38,634    | 46,373    | 64,000    | 68,320    | 39,030    | 18,900    | 15,140    | 17,430    |
| Com_615_pos | Phe-Pro                           | C14H18N2O3  | 262.30 | 4.48  | 263.14 | Amino Acid And Its Derivatives   | 230,300   | 199,700   | 160,300   | 265,700   | 238,200   | 217,100   | 125,200   | 133,600   | 101,900   |
| Com_614_pos | Phloretin                         | C15H14O5    | 274.27 | 7.75  | 275.09 | Phenylpropanoids                 | 68,896    | 32,799    | 31,890    | 639,100   | 556,100   | 534,700   | 76,730    | 138,900   | 127,600   |
| Com_315_neg | Phloridzin                        | C21H28O12   | 472.44 | 5.94  | 437.14 | Flavonoids                       | 7,039     | 4,809     | 5,418     | 20,100    | 26,230    | 21,930    | 16,110    | 18,920    | 14,680    |
| Com_431_pos | Phosphocreatine                   | C4H10N3O5P  | 211.11 | 1.08  | 212.10 | Amino Acid And Its Derivatives   | 1,508,000 | 749,100   | 581,200   | 1,440,000 | 1,668,000 | 1,383,000 | 1,007,000 | 1,122,000 | 784,600   |
| Com_160_neg | Phosphoenolpyruvic acid           | C3H5O6P     | 168.04 | 0.61  | 167.10 | Organic Acid And Its Derivatives | 37,250    | 31,310    | 28,660    | 25,260    | 24,830    | 16,450    | 35,910    | 32,090    | 33,880    |
| Com_123_neg | Phosphoribosyl pyrophosphate      | C5H13O14P3  | 196.25 | 0.62  | 189.00 | Carbohydrates                    | 56,760    | 38,970    | 58,320    | 19,050    | 32,700    | 26,030    | 16,440    | 14,160    | 12,780    |
| Com_58_neg  | Physcion                          | C16H12O5    | 284.26 | 11.97 | 283.06 | Others                           | 46,940    | 52,667    | 48,290    | 2,397     | 2,026     | 2,223     | 64,860    | 58,160    | 55,730    |
| Com_59_neg  | Physcion 8-O-Beta-D-Monoglucoside | C22H22O10   | 446.40 | 5.96  | 445.11 | Others                           | 95,355    | 77,209    | 63,510    | 11,960    | 16,360    | 15,050    | 34,930    | 37,220    | 41,500    |
| Com_708_pos | Phytocassane E                    | C20H28O3    | 316.43 | 10.92 | 317.21 | Terpenoids                       | 14,020    | 53,614    | 51,728    | 61,750    | 56,960    | 51,800    | 57,440    | 30,750    | 28,200    |
| Com_254_neg | Pinobanksin                       | C15H12O5    | 272.07 | 9.30  | 271.00 | Flavonoids                       | 32,270    | 20,670    | 9,797     | 28,800    | 34,260    | 25,120    | 17,170    | 14,700    | 14,010    |
| Com_152_neg | Pinocembrin                       | C15H12O4    | 256.07 | 0.70  | 255.10 | Flavonoids                       | 41,730    | 22,850    | 18,180    | 41,040    | 46,820    | 40,190    | 22,240    | 31,170    | 27,900    |
| Com_78_neg  | PinoresinolDiglucoside            | C32H42O16   | 682.68 | 7.91  | 679.06 | Phenols                          | 9,011     | 10,510    | 9,943     | 344,200   | 276,900   | 203,900   | 49,870    | 44,640    | 63,130    |
| Com_23_neg  | Pinoresinol-glucoside             | C26H32O11   | 520.53 | 9.17  | 519.19 | Phenylpropanoids                 | 18,310    | 8,248     | 9,414     | 24,130    | 26,910    | 27,740    | 13,540    | 10,270    | 11,670    |
| Com_706_pos | Pipecolic acid                    | C6H11NO2    | 129.16 | 0.79  | 130.09 | Organic Acid And Its Derivatives | #####     | #####     | #####     | 4,064,000 | 3,673,000 | 3,529,000 | #####     | #####     | #####     |
| Com_54_neg  | Plantagoside                      | C21H22O12   | 466.39 | 4.55  | 465.10 | Flavonoids                       | 253,700   | 173,100   | 162,400   | 9,769     | 5,558     | 11,430    | 31,200    | 26,820    | 28,190    |
| Com_705_pos | p-Nitroaniline                    | C6H6N2O2    | 138.12 | 1.06  | 139.00 | Others                           | 93,870    | 162,400   | 98,700    | 314,300   | 282,700   | 298,900   | 216,600   | 197,000   | 206,800   |
| Com_55_neg  | Polydatin                         | C20H23O9    | 407.39 | 8.01  | 389.12 | Phenylpropanoids                 | 52,328    | 18,680    | 19,808    | 50,890    | 51,060    | 53,990    | 13,690    | 17,210    | 14,080    |
| Com_385_pos | PolygalaxanthoneVI                | C23H26O12   | 494.44 | 6.45  | 495.15 | Others                           | 92,540    | 45,810    | 77,860    | 23,340    | 24,060    | 27,510    | 16,280    | 20,740    | 18,170    |
| Com_493_pos | PolygalaxanthoneVII               | C27H32O16   | 612.54 | 5.26  | 613.18 | Phenols                          | 504,600   | 798,600   | 1,232,000 | 21,990    | 37,850    | 15,820    | 142,400   | 221,900   | 111,100   |
| Com_386_pos | Polypodine B                      | C27H44O8    | 496.63 | 0.83  | 497.31 | Terpenoids                       | 343,700   | 243,500   | 389,100   | 337,600   | 308,900   | 326,500   | 151,800   | 206,500   | 209,800   |
| Com_150_neg | Poncirin                          | C28H34O14   | 594.20 | 8.40  | 593.00 | Flavonoids                       | 572,000   | 1,890,000 | 849,100   | 2,584,000 | 2,223,000 | 2,342,000 | 660,800   | 683,300   | 746,200   |
| Com_384_pos | Prim-O-glucosylcimifugin          | C22H28O11   | 468.45 | 5.19  | 469.17 | Flavonoids                       | 427,400   | 47,080    | 76,380    | 679,100   | 656,500   | 536,900   | 939,500   | 1,200,000 | 1,046,000 |
| Com_334_pos | Proline                           | C5H9NO2     | 115.13 | 0.75  | 133.15 | Amino Acid And Its Derivatives   | #####     | #####     | #####     | 3,927,000 | 3,623,000 | 3,697,000 | #####     | #####     | 9,938,000 |
| Com_294_neg | Protocatechuic Acid               | C7H6O4      | 154.12 | 0.73  | 153.00 | Phenols                          | #####     | 2,193,000 | 2,410,000 | 1,663,000 | 1,856,000 | 1,964,000 | 2,697,000 | 2,734,000 | 2,555,000 |

|             |                                          |             |        |       |        |                                  |           |           |           |           |           |           |           |           |           |
|-------------|------------------------------------------|-------------|--------|-------|--------|----------------------------------|-----------|-----------|-----------|-----------|-----------|-----------|-----------|-----------|-----------|
| Com_118_neg | Prunin                                   | C21H22O10   | 434.39 | 9.40  | 433.12 | Flavonoids                       | 95,070    | 46,330    | 35,290    | 65,980    | 86,170    | 96,100    | 41,240    | 36,740    | 36,530    |
| Com_122_neg | Prunindihydrochalcone                    | C21H24O10   | 436.41 | 7.38  | 435.13 | Phenols                          | 22,960    | 9,158     | 2,051     | 11,732    | 12,974    | 13,442    | 5,444     | 4,842     | 7,686     |
| Com_611_pos | Przewaquinone A                          | C19H18O4    | 310.34 | 12.50 | 311.00 | Others                           | 237,700   | 257,500   | 221,400   | 246,600   | 242,900   | 230,400   | 317,500   | 190,600   | 234,900   |
| Com_540_pos | Pseudoephedrine                          | C10H15NO    | 165.23 | 2.87  | 166.12 | Alkaloids                        | 1,361,000 | 218,200   | 249,100   | 36,290    | 25,190    | 32,720    | 138,500   | 149,400   | 147,200   |
| Com_237_neg | Pseudouridine                            | C9H12N2O6   | 244.07 | 0.90  | 243.00 | Nucleotide And Its Derivates     | 175,500   | 91,650    | 105,400   | 77,050    | 71,520    | 86,710    | 91,130    | 58,520    | 60,150    |
| Com_549_pos | Psoralen                                 | C11H6O3     | 186.16 | 8.12  | 187.04 | Phenylpropanoids                 | 33,530    | 19,540    | 32,022    | 44,310    | 51,690    | 39,080    | 33,950    | 34,570    | 44,370    |
| Com_486_pos | Pteroside A                              | C21H30O8    | 410.46 | 4.53  | 411.20 | Terpenoids                       | 174,300   | 97,793    | 67,641    | 433,600   | 425,700   | 394,800   | 98,030    | 90,570    | 83,870    |
| Com_409_pos | pterodin A                               | C15H20O3    | 248.32 | 8.97  | 249.15 | Others                           | 42,790    | 13,624    | 4,528     | 46,630    | 51,272    | 45,322    | 21,380    | 18,080    | 17,830    |
| Com_339_pos | Pterostilbene                            | C16H16O3    | 256.30 | 0.61  | 257.12 | Phenylpropanoids                 | 94,470    | 49,160    | 33,550    | 176,900   | 263,800   | 151,400   | 113,100   | 155,200   | 165,700   |
| Com_548_pos | Purine                                   | C5H4N4      | 120.11 | 1.66  | 121.00 | Nucleotide And Its Derivates     | 183,000   | 503,700   | 589,300   | 59,610    | 44,500    | 45,790    | 134,900   | 140,900   | 126,100   |
| Com_305_neg | Pyridoxal 5'-Phosphate                   | C8H10NO6P   | 247.14 | 0.76  | 246.00 | Terpenoids                       | 31,790    | 19,650    | 9,600     | 31,910    | 29,330    | 18,370    | 26,010    | 24,970    | 15,270    |
| Com_546_pos | Pyridoxine                               | C8H11NO3    | 169.18 | 0.85  | 170.10 | Terpenoids                       | 581,800   | 448,500   | 120,100   | 963,400   | 802,500   | 826,000   | 944,700   | 913,100   | 785,600   |
| Com_682_pos | Pyrrole-2-Carboxylic Acid                | C5H5NO2     | 111.10 | 0.73  | 112.10 | Organic Acid And Its Derivatives | 1,173,000 | 303,600   | 196,200   | 362,500   | 317,800   | 349,000   | 483,800   | 511,200   | 567,800   |
| Com_53_neg  | Pyrroloquinoline quinone                 | C14H6N2O8   | 330.01 | 23.50 | 329.00 | Alkaloids                        | 4,569,000 | 4,451,000 | 6,610,000 | 4,601,000 | 4,732,000 | 4,664,000 | 4,256,000 | 4,161,000 | 5,599,000 |
| Com_257_neg | Pyruvic Acid                             | C3H4O3      | 88.06  | 0.59  | 87.01  | Organic Acid And Its Derivatives | 3,324,000 | 1,674,000 | 1,795,000 | 4,602,000 | 5,506,000 | 5,218,000 | 3,127,000 | 2,302,000 | 1,837,000 |
| Com_681_pos | Quercetin                                | C15H10O7    | 302.24 | 6.78  | 303.05 | Flavonoids                       | 756,200   | 563,400   | 509,700   | 84,170    | 82,090    | 83,320    | 113,000   | 121,400   | 102,700   |
| Com_679_pos | Quercetin 3-D-galactoside                | C21H20O12   | 464.38 | 4.72  | 465.10 | Flavonoids                       | #####     | #####     | #####     | #####     | 9,865,000 | #####     | 6,125,000 | 6,974,000 | 7,432,000 |
| Com_207_neg | Quercetin 3-O-sophoroside                | C27H30O1    | 626.52 | 5.95  | 625.14 | Alkaloids                        | 7,932,000 | 1,945,000 | 1,992,000 | 2,044,000 | 1,847,000 | 1,898,000 | 1,200,000 | 1,233,000 | 1,238,000 |
| Com_205_neg | Quercetin 3-β-D-glucoside                | C21H20O12   | 464.38 | 6.78  | 463.09 | Carbohydrates                    | #####     | #####     | #####     | #####     | #####     | #####     | #####     | #####     | #####     |
| Com_267_neg | Quercetin 4'-O-glucoside (Spiraeoside)   | C21H20O12   | 464.10 | 7.40  | 463.00 | Flavonoids                       | #####     | #####     | #####     | 3,600,000 | 3,298,000 | 3,365,000 | 5,671,000 | 6,232,000 | 5,216,000 |
| Com_684_pos | Quercetin 5-O-hexoside                   |             |        | 6.52  | 465.10 | Flavonoids                       | 1,201,000 | 4,650,000 | 2,556,000 | 386,300   | 375,600   | 349,200   | 374,600   | 589,300   | 558,400   |
| Com_677_pos | Quercetin O-malonylhexaside              |             |        | 5.46  | 551.00 | Flavonoids                       | 644,200   | 864,400   | 920,500   | 119,200   | 56,890    | 86,090    | 127,600   | 185,300   | 209,600   |
| Com_680_pos | Quercetin-3,4'-O-di-beta-glucopyranoside | C27H30O17   | 626.52 | 4.56  | 627.50 | Flavonoids                       | 6,701,000 | 1,895,000 | 2,042,000 | 908,400   | 957,800   | 1,139,000 | 617,100   | 799,900   | 804,200   |
| Com_206_neg | Quercetin-3'-O-glucoside                 | C21H20O12   | 464.38 | 6.51  | 463.09 | Flavonoids                       | #####     | #####     | #####     | #####     | 9,795,000 | #####     | #####     | #####     | #####     |
| Com_683_pos | Quercetin-O-glucoside                    | C21H20O12   | 464.38 | 6.52  | 465.10 | Flavonoids                       | 470,400   | 2,216,000 | 1,189,000 | 84,510    | 99,960    | 84,100    | 104,700   | 97,090    | 68,820    |
| Com_581_pos | Quercitrin                               | C21H20O11   | 448.38 | 6.14  | 449.00 | Flavonoids                       | 118,500   | 470,500   | 178,300   | 16,780    | 18,110    | 10,230    | 61,840    | 60,550    | 40,760    |
| Com_676_pos | Quinic acid                              | C7H12O6     | 192.17 | 0.81  | 193.10 | Lipids                           | 1,029,000 | 500,700   | 454,500   | 2,026,000 | 2,413,000 | 2,548,000 | 974,200   | 861,000   | 934,500   |
| Com_249_neg | Quinolinic acid                          | C7H5NO4     | 167.12 | 0.67  | 166.02 | Organic Acid And Its Derivatives | 10,070    | 3,882     | 4,546     | 5,034     | 4,385     | 5,595     | 4,981     | 5,545     | 3,973     |
| Com_9_neg   | Raffinose                                | C18H32O16   | 504.44 | 0.90  | 503.44 | Carbohydrates                    | 3,213,000 | 2,476,000 | 3,740,000 | 2,133,000 | 2,180,000 | 2,381,000 | 2,076,000 | 2,288,000 | 2,219,000 |
| Com_330_pos | Raspberry Ketone                         | C10H12O2    | 164.20 | 20.49 | 165.09 | Phenols                          | 13,364    | 8,249     | 9,209     | 14,331    | 15,429    | 15,315    | 5,591     | 5,106     | 8,034     |
| Com_636_pos | Reduced glutathione                      | C10H17N3O6S | 307.32 | 0.83  | 308.00 | Amino Acid And Its Derivatives   | 27,190    | 35,110    | 28,920    | 26,310    | 34,930    | 26,210    | 36,830    | 40,180    | 27,720    |
| Com_246_neg | Rehmannioside A                          | C21H32O15   | 524.47 | 8.56  | 523.17 | Terpenoids                       | 61,646    | 18,680    | 35,387    | 49,750    | 43,920    | 47,020    | 13,870    | 16,910    | 17,030    |
| Com_22_neg  | Rhamnetin                                | C16H12O7    | 316.26 | 1.60  | 315.00 | Flavonoids                       | 4,057,000 | 2,345,000 | 1,854,000 | 899,000   | 805,800   | 939,200   | 1,119,000 | 1,221,000 | 1,121,000 |
| Com_739_pos | Rhodomyrtone                             | C26H34O6    | 442.54 | 13.03 | 460.40 | Others                           | 647,500   | 2,342,000 | 2,325,000 | 668,300   | 621,700   | 693,200   | 876,700   | 904,000   | 1,030,000 |
| Com_251_neg | Rhoifolin                                | C27H30O14   | 578.52 | 7.78  | 577.16 | Flavonoids                       | 9,201     | 4,775     | 16,190    | 188,200   | 184,000   | 197,300   | 61,120    | 54,600    | 65,010    |

|             |                               |              |        |       |        |                                  |           |           |           |           |           |           |           |           |           |
|-------------|-------------------------------|--------------|--------|-------|--------|----------------------------------|-----------|-----------|-----------|-----------|-----------|-----------|-----------|-----------|-----------|
| Com_120_neg | Ribitol                       | C5H12O5      | 152.07 | 0.70  | 151.00 | Carbohydrates                    | 218,300   | 56,520    | 17,290    | 25,970    | 29,730    | 34,460    | 575,000   | 425,500   | 361,000   |
| Com_124_neg | Ribose 5-phosphate            | C5H11O8P     | 230.11 | 0.62  | 229.00 | Carbohydrates                    | 31,410    | 51,870    | 40,490    | 16,670    | 28,160    | 11,760    | 30,540    | 31,120    | 23,270    |
| Com_197_neg | Rutin                         | C27H30O16    | 610.52 | 6.66  | 609.10 | Flavonoids                       | #####     | #####     | #####     | 3,254,000 | 3,127,000 | 3,071,000 | #####     | #####     | #####     |
| Com_433_pos | S-(5-Adenosyl)-L-Homocysteine | C14H20N6O5S  | 384.41 | 0.82  | 385.00 | Amino Acid And Its Derivatives   | 19,490    | 249,400   | 225,800   | 96,800    | 83,600    | 65,200    | 57,080    | 62,620    | 44,950    |
| Com_275_neg | Salicylic acid O-glucoside    | C13H16O8     | 300.10 | 2.66  | 299.10 | Organic Acid And Its Derivatives | 3,497,000 | 2,194,000 | 2,089,000 | #####     | #####     | #####     | 3,324,000 | 3,345,000 | 3,550,000 |
| Com_153_neg | Saponarin                     | C27H30O15    | 594.52 | 7.81  | 593.16 | Others                           | 609,700   | 54,970    | 656,400   | 288,500   | 287,800   | 267,000   | 568,500   | 592,900   | 568,000   |
| Com_592_pos | Sattabacin                    | C13H18O2     | 206.28 | 4.81  | 207.20 | Others                           | 158,400   | 61,310    | 26,160    | 777,600   | 675,400   | 722,100   | 244,900   | 293,300   | 242,000   |
| Com_591_pos | Schaftoside                   | C26H28O14    | 564.49 | 4.74  | 565.16 | Flavonoids                       | 509,700   | 178,600   | 39,590    | 386,600   | 382,500   | 323,700   | 312,000   | 361,200   | 375,700   |
| Com_363_pos | Sclareol Glycol               | C16H30O2     | 254.41 | 11.20 | 255.23 | Others                           | 26,500    | 20,230    | 27,680    | 23,800    | 18,630    | 23,160    | 22,660    | 16,510    | 27,100    |
| Com_720_pos | Scopolamine                   | C17H21NO4    | 303.35 | 5.27  | 304.15 | Alkaloids                        | 1,903,000 | 3,580,000 | 2,174,000 | 208,800   | 225,700   | 197,800   | 575,100   | 665,000   | 629,400   |
| Com_719_pos | Scopoletin                    | C10H8O4      | 192.17 | 4.48  | 193.10 | Phenylpropanoids                 | 69,500    | 27,135    | 36,223    | 115,600   | 122,500   | 94,680    | 34,870    | 26,630    | 25,100    |
| Com_83_neg  | Scutellarein                  | C15H10O6     | 286.24 | 14.67 | 285.04 | Flavonoids                       | 4,452     | 4,784     | 5,898     | 4,254     | 4,490     | 5,113     | 4,418     | 5,430     | 4,028     |
| Com_84_neg  | Sebacic acid                  | C10H18O4     | 202.25 | 0.63  | 201.10 | Organic Acid And Its Derivatives | 173,100   | 109,100   | 121,300   | 98,120    | 141,000   | 86,240    | 136,600   | 128,600   | 143,500   |
| Com_398_pos | Secoisolaricresinol           | C20H26O6     | 362.42 | 14.94 | 363.18 | Phenols                          | 6,294     | 5,790     | 8,441     | 1,676     | 2,108     | 1,456     | 1,856     | 5,752     | 6,115     |
| Com_395_pos | Sedoheptulose Anhydride       | C7H12O6      | 192.17 | 0.61  | 215.06 | Carbohydrates                    | 35,520    | 63,070    | 34,960    | 107,000   | 41,400    | 62,860    | 56,840    | 35,140    | 32,020    |
| Com_517_pos | Serotonin                     | C10H12N2O    | 176.22 | 0.91  | 177.00 | Amino Acid And Its Derivatives   | 61,950    | 77,070    | 37,130    | 71,870    | 107,500   | 86,350    | 119,300   | 53,080    | 79,010    |
| Com_217_neg | Sibiricose A5                 | C22H30O14    | 518.47 | 5.90  | 517.16 | Phenylpropanoids                 | 9,273     | 20,200    | 12,830    | 11,220    | 9,203     | 8,619     | 6,315     | 6,838     | 8,968     |
| Com_285_neg | Sibiricose A6                 | C23H32O15    | 548.49 | 6.29  | 547.17 | Phenylpropanoids                 | 38,200    | 69,230    | 67,370    | 13,550    | 13,960    | 12,360    | 12,930    | 16,660    | 15,450    |
| Com_216_neg | Sibirioside A                 | C21H28O12    | 472.44 | 9.16  | 471.15 | Others                           | 168,100   | 571,300   | 589,500   | 13,540    | 17,870    | 15,220    | 122,200   | 106,200   | 112,300   |
| Com_508_pos | Sibutramine                   | C17H26ClN    | 279.85 | 17.12 | 280.18 | Others                           | 21,470    | 65,870    | 94,320    | 19,240    | 21,860    | 18,310    | 20,430    | 24,050    | 24,320    |
| Com_516_pos | Sildenafil                    | C22H30N6O4S  | 474.58 | 12.21 | 475.21 | Others                           | 36,620    | 70,160    | 61,950    | 57,380    | 44,070    | 36,250    | 43,600    | 37,470    | 42,950    |
| Com_515_pos | Sinapoyl O-hexoside           | C17H22O10    | 370.35 | 4.17  | 404.16 | Phenols                          | 27,140    | 16,080    | 15,005    | 11,260    | 8,995     | 8,536     | 10,710    | 7,381     | 5,809     |
| Com_514_pos | Sinensetin                    | C20H20O7     | 372.37 | 11.68 | 373.10 | Flavonoids                       | 40,870    | 26,090    | 44,530    | 50,790    | 51,700    | 65,080    | 36,970    | 35,820    | 32,120    |
| Com_270_neg | Sinigrin                      | C10H16KNO9S2 | 397.46 | 0.63  | 358.00 | Others                           | 222,900   | 133,300   | 139,600   | 553,000   | 558,700   | 488,700   | 285,900   | 248,200   | 286,500   |
| Com_204_neg | Sinomenine                    | C19H23NO4    | 329.39 | 10.26 | 328.16 | Alkaloids                        | 5,867     | 4,337     | 7,430     | 5,862     | 4,808     | 5,410     | 8,868     | 10,710    | 14,260    |
| Com_513_pos | S-Methyl-L-cysteine           | C4H9NO2S     | 135.19 | 0.77  | 136.10 | Amino Acid And Its Derivatives   | 2,059,000 | 755,700   | 535,800   | 1,008,000 | 982,200   | 983,000   | 858,400   | 893,400   | 803,800   |
| Com_408_pos | Sodium Taurocholate           | C26H44NNaO7S | 537.69 | 24.63 | 538.28 | Lipids                           | 61,450    | 53,910    | 52,890    | 50,600    | 54,530    | 50,530    | 66,780    | 51,920    | 49,400    |
| Com_512_pos | Sodium taurodeoxycholate      | C26H44NNaO6S | 521.69 | 10.98 | 522.29 | Lipids                           | 4,722     | 2,427     | 819       | 8,282     | 9,926     | 12,580    | 12,910    | 21,960    | 19,890    |
| Com_410_pos | Sophoricoside                 | C21H20O10    | 432.38 | 6.15  | 433.11 | Flavonoids                       | 139,000   | 14,210    | 49,310    | 114,600   | 156,400   | 102,400   | 44,350    | 67,720    | 60,470    |
| Com_400_pos | Spermidine                    | C7H19N3      | 145.25 | 0.50  | 146.20 | Amino Acid And Its Derivatives   | 155,100   | 163,200   | 179,900   | 810,500   | 719,500   | 645,400   | 150,900   | 179,600   | 216,500   |
| Com_411_pos | Spermidine derivative         | C8H21N3O6    | 255.27 | 17.31 | 256.15 | Phenols                          | 4,141     | 9,405     | 12,750    | 3,524     | 2,287     | 4,001     | 4,972     | 5,070     | 3,705     |
| Com_412_pos | Spermine                      | C10H26N4     | 202.34 | 0.56  | 203.20 | Amino Acid And Its Derivatives   | 111,000   | 202,400   | 238,900   | 122,200   | 118,400   | 61,540    | 111,700   | 88,450    | 89,860    |
| Com_402_pos | Stachydrine                   | C7H13NO3     | 159.18 | 0.78  | 144.10 | Alkaloids                        | 1,991,000 | 871,800   | 204,700   | 1,470,000 | 1,038,000 | 1,215,000 | 1,592,000 | 1,364,000 | 1,415,000 |
| Com_193_neg | Stevioside                    | C38H60O18    | 804.87 | 10.29 | 803.37 | Terpenoids                       | 29,210    | 9,068     | 14,770    | 9,375     | 9,270     | 8,998     | 5,806     | 7,855     | 5,893     |
| Com_381_pos | Stigmasterol                  | C29H48O      | 412.69 | 22.92 | 413.38 | Lipids                           | 3,963     | 1,453     | 2,878     | 3,372     | 6,403     | 4,797     | 8,121     | 3,773     | 3,022     |

|             |                                      |              |        |       |        |                                  |           |           |           |           |           |           |           |           |           |
|-------------|--------------------------------------|--------------|--------|-------|--------|----------------------------------|-----------|-----------|-----------|-----------|-----------|-----------|-----------|-----------|-----------|
| Com_312_neg | Succinic acid                        | C4H6O4       | 118.09 | 0.89  | 117.02 | Organic Acid And Its Derivatives | 42,710    | 10,280    | 13,350    | 39,080    | 39,520    | 38,740    | 21,340    | 11,040    | 11,870    |
| Com_288_neg | Succinic anhydride                   | C4H4O3       | 100.07 | 0.63  | 99.02  | Organic Acid And Its Derivatives | 212,900   | 71,050    | 74,870    | 273,600   | 442,100   | 388,500   | 190,700   | 147,300   | 127,900   |
| Com_652_pos | Sugiol                               | C20H28O2     | 300.44 | 14.58 | 301.20 | Terpenoids                       | 5,596     | 22,016    | 22,837    | 201,700   | 175,800   | 195,300   | 26,930    | 39,080    | 40,050    |
| Com_310_neg | Sulfosalicylic acid                  | C7H6O6S      | 218.18 | 0.66  | 216.98 | Organic Acid And Its Derivatives | 67,830    | 44,100    | 33,520    | 67,230    | 50,680    | 72,400    | 52,890    | 37,890    | 34,950    |
| Com_500_pos | Swainsonine                          | C8H15NO3     | 173.21 | 0.71  | 174.11 | Alkaloids                        | 344,300   | 165,000   | 107,400   | 530,900   | 257,700   | 428,800   | 371,900   | 274,800   | 247,900   |
| Com_478_pos | Syringetin 3-O-hexoside              |              |        | 3.30  | 509.10 | Flavonoids                       | 38,590    | 87,840    | 38,245    | 18,030    | 25,490    | 12,750    | 37,560    | 59,230    | 44,430    |
| Com_272_neg | Syringic acid O-glucoside            |              | 360.10 | 1.10  | 359.10 | Organic Acid And Its Derivatives | 734,500   | 458,200   | 207,600   | 3,506,000 | 2,493,000 | 2,616,000 | 606,000   | 720,700   | 740,700   |
| Com_578_pos | Syringin                             | C17H24O9     | 372.37 | 3.79  | 390.18 | Phenols                          | 28,114    | 14,318    | 17,935    | 53,060    | 61,990    | 49,040    | 5,549     | 10,410    | 8,074     |
| Com_709_pos | Tanshinone II B                      | C19H18O4     | 310.35 | 11.16 | 311.00 | Others                           | 180,600   | 330,900   | 333,700   | 123,800   | 125,600   | 125,100   | 170,900   | 180,300   | 177,400   |
| Com_187_neg | Taurine                              | C2H7NO3S     | 125.15 | 0.64  | 124.00 | Amino Acid And Its Derivatives   | 194,000   | 56,200    | 23,770    | 49,500    | 59,720    | 51,900    | 53,990    | 39,280    | 30,950    |
| Com_396_pos | Taurocholic acid sodium salt hydrate | C26H44NNaO7S | 537.69 | 16.70 | 556.30 | Lipids                           | 765,300   | 694,200   | 736,100   | 779,200   | 718,600   | 702,900   | 926,800   | 803,900   | 696,600   |
| Com_571_pos | Thiamin                              | C12H17N4OS   | 265.35 | 0.65  | 265.11 | Terpenoids                       | 897,400   | 981,300   | 673,600   | 319,900   | 350,200   | 341,700   | 264,900   | 327,400   | 320,300   |
| Com_525_pos | Threonine                            | C4H9NO3      | 119.12 | 0.75  | 120.07 | Amino Acid And Its Derivatives   | 294,100   | 444,500   | 740,700   | 90,690    | 85,750    | 106,700   | 241,200   | 234,800   | 222,400   |
| Com_570_pos | Threonyl carbamoyl adenosine         | C15H20N6O8   | 412.35 | 3.23  | 413.14 | Nucleotide And Its Derivates     | 262,300   | 86,740    | 81,030    | 45,680    | 46,140    | 39,550    | 52,820    | 53,170    | 57,210    |
| Com_569_pos | Thymidine                            | C10H14N2O5   | 242.23 | 1.06  | 243.10 | Nucleotide And Its Derivates     | 173,200   | 81,300    | 67,990    | 111,304   | 107,789   | 110,298   | 105,800   | 30,220    | 56,420    |
| Com_35_neg  | Thymidine 5'-diphosphate             |              |        | 0.74  | 401.10 | Nucleotide And Its Derivates     | 30,960    | 20,700    | 19,910    | 33,130    | 16,970    | 17,380    | 25,110    | 24,610    | 24,700    |
| Com_573_pos | Thymine                              | C5H6N2O2     | 126.11 | 1.11  | 127.00 | Nucleotide And Its Derivates     | 90,150    | 137,800   | 59,360    | 26,410    | 27,750    | 64,854    | 97,460    | 74,070    | 38,570    |
| Com_579_pos | Tianshic acid                        | C18H37NO5    | 347.49 | 10.12 | 348.10 | Lipids                           | 648,200   | 91,240    | 86,940    | 52,490    | 58,700    | 54,240    | 196,400   | 205,500   | 199,600   |
| Com_169_neg | Tiliroside                           | C30H26O13    | 594.52 | 7.69  | 593.13 | Flavonoids                       | 5,839,000 | 8,031,000 | 5,837,000 | 847,100   | 814,900   | 851,200   | 1,333,000 | 1,301,000 | 1,311,000 |
| Com_583_pos | Timosaponin A1                       | C33H54O8     | 578.78 | 7.77  | 579.39 | Others                           | 193,400   | 18,010    | 60,910    | 91,360    | 101,400   | 111,200   | 99,160    | 89,240    | 106,900   |
| Com_453_pos | Topotecan                            | C23H23N3O5   | 421.45 | 12.21 | 422.17 | Alkaloids                        | 2,443,000 | 4,691,000 | 3,828,000 | 3,764,000 | 3,104,000 | 2,863,000 | 2,844,000 | 3,130,000 | 3,033,000 |
| Com_455_pos | trans-2-Hexenal                      | C6H10O       | 98.14  | 12.33 | 99.10  | Others                           | #####     | #####     | #####     | #####     | #####     | #####     | #####     | #####     | #####     |
| Com_335_pos | trans-3-Hydroxy-L-proline            | C5H9NO3      | 131.13 | 0.81  | 132.06 | Amino Acid And Its Derivatives   | 514,800   | 889,900   | 1,025,000 | 83,860    | 50,310    | 77,030    | 366,600   | 371,900   | 373,700   |
| Com_336_pos | trans-3-Indoleacrylic acid           | C11H9NO2     | 187.20 | 2.58  | 188.10 | Organic Acid And Its Derivatives | 4,833,000 | #####     | #####     | 5,233,000 | 4,441,000 | 4,702,000 | 4,618,000 | 5,047,000 | 4,959,000 |
| Com_338_pos | trans-Zeatin riboside                | C15H21N5O5   | 351.36 | 0.65  | 352.30 | Nucleotide And Its Derivates     | 627,900   | 245,700   | 166,200   | 86,950    | 95,370    | 86,290    | 156,600   | 131,500   | 136,000   |
| Com_337_pos | Tricetin O-hexoside                  |              |        | 6.52  | 465.00 | Flavonoids                       | 1,106,000 | 4,079,000 | 2,050,000 | 349,800   | 249,200   | 318,400   | 464,500   | 493,000   | 535,300   |
| Com_318_neg | Tricin 5-O-rutinoside                |              | 638.10 | 7.91  | 637.10 | Flavonoids                       | 18,340    | 9,635     | 13,900    | 9,022     | 10,500    | 8,041     | 8,272     | 2,807     | 5,550     |
| Com_499_pos | Tricin di-O-hexoside                 |              |        | 5.30  | 655.20 | Flavonoids                       | 9,490     | 2,894     | 14,230    | 8,460     | 7,135     | 2,636     | 5,781     | 5,515     | 3,121     |
| Com_317_neg | Tricin O-saccharic acid              |              | 522.10 | 8.77  | 521.10 | Flavonoids                       | 536,700   | 175,400   | 35,890    | 1,260,000 | 1,268,000 | 1,285,000 | 409,800   | 344,100   | 402,800   |

|             |                                             |                  |        |       |        |                                  |           |           |           |           |           |           |           |           |           |
|-------------|---------------------------------------------|------------------|--------|-------|--------|----------------------------------|-----------|-----------|-----------|-----------|-----------|-----------|-----------|-----------|-----------|
| Com_255_neg | Trifolin                                    | C21H20O11        | 448.10 | 8.32  | 447.00 | Flavonoids                       | 4,246,000 | 2,627,000 | 1,214,000 | 183,000   | 177,900   | 175,600   | 670,800   | 723,000   | 747,600   |
| Com_261_neg | Trifolirhizin +HCOOH                        | C22H22O10        | 446.40 | 18.58 | 491.12 | Flavonoids                       | 103,800   | 27,380    | 10,520    | 55,460    | 49,200    | 34,720    | 44,050    | 51,720    | 48,870    |
| Com_452_pos | Trimethylamine N-Oxide                      | C3H9NO           | 75.11  | 0.85  | 76.00  | Amino Acid And Its Derivatives   | 6,382     | 5,946     | 2,003     | 13,767    | 15,436    | 13,490    | 6,427     | 5,398     | 6,910     |
| Com_505_pos | Tryptamine                                  | C10H12N2         | 160.22 | 0.79  | 161.10 | Alkaloids                        | 138,800   | 211,200   | 299,300   | 141,000   | 150,400   | 128,600   | 155,900   | 157,500   | 144,300   |
| Com_523_pos | Tyramine                                    | C8H11NO          | 137.18 | 0.98  | 138.10 | Others                           | 44,880    | 410,400   | 157,300   | 391,300   | 339,700   | 371,700   | 141,700   | 101,100   | 116,800   |
| Com_724_pos | Uracil                                      | C4H4N2O2         | 112.09 | 0.72  | 113.00 | Nucleotide And Its Derivates     | 792,100   | 425,900   | 263,800   | 761,700   | 627,800   | 660,600   | 690,700   | 691,400   | 600,700   |
| Com_459_pos | Urea                                        | CH4N2O           | 60.06  | 0.63  | 61.00  | Others                           | 20,050    | 50,810    | 50,790    | 46,100    | 53,730    | 43,300    | 71,860    | 73,920    | 70,650    |
| Com_725_pos | Uridine                                     | C9H12N2O6        | 244.20 | 0.91  | 245.10 | Nucleotide And Its Derivates     | 939,900   | 397,100   | 270,000   | 646,100   | 676,200   | 573,100   | 600,100   | 462,500   | 546,600   |
| Com_225_neg | Uridine 5'-diphosphate                      | C15H24N2Na2O18P2 | 466.14 | 0.57  | 463.00 | Nucleotide And Its Derivates     | 59,870    | 61,290    | 71,330    | 35,630    | 30,590    | 33,050    | 42,220    | 36,700    | 38,560    |
| Com_77_neg  | Uridine 5'-diphospho-D-glucose              | C15H24N2O17P2    | 566.10 | 0.68  | 565.10 | Nucleotide And Its Derivates     | 145,200   | 227,700   | 330,800   | 46,280    | 65,760    | 86,610    | 60,830    | 34,520    | 44,870    |
| Com_50_neg  | Uridine 5'-monophosphate                    | C9H13N2O9P       | 324.04 | 0.80  | 323.00 | Nucleotide And Its Derivates     | 511,000   | 177,900   | 165,000   | 217,600   | 238,700   | 186,600   | 157,500   | 117,500   | 147,100   |
| Com_717_pos | Val-Ser                                     | C8H16N2O4        | 204.22 | 0.86  | 205.12 | Amino Acid And Its Derivatives   | 168,100   | 120,700   | 96,700    | 216,600   | 165,600   | 216,200   | 120,900   | 171,500   | 118,200   |
| Com_17_neg  | Vanillic acid                               | C8H8O4           | 168.15 | 4.18  | 167.04 | Organic Acid And Its Derivatives | 657,900   | 104,800   | 167,600   | 21,554    | 20,820    | 19,970    | 59,330    | 53,880    | 47,990    |
| Com_659_pos | vasicine                                    | C11H12N2O        | 188.23 | 2.45  | 189.10 | Alkaloids                        | 777,900   | 3,897,000 | 3,128,000 | 827,000   | 736,200   | 752,000   | 792,500   | 871,800   | 819,500   |
| Com_521_pos | Viscumamide                                 | C30H55N5O5       | 565.79 | 24.15 | 566.20 | Amino Acid And Its Derivatives   | 76,660    | 84,430    | 75,440    | 78,580    | 66,130    | 72,180    | 117,400   | 86,110    | 77,660    |
| Com_663_pos | Vitamin B2                                  | C17H20N4O6       | 376.36 | 4.24  | 377.00 | Terpenoids                       | 749,100   | 188,800   | 186,000   | 141,100   | 151,600   | 154,100   | 206,700   | 222,100   | 201,000   |
| Com_645_pos | Vitexin                                     | C21H20O10        | 432.38 | 4.80  | 433.11 | Flavonoids                       | 218,500   | 31,040    | 323,300   | 116,900   | 89,790    | 102,700   | 163,200   | 183,500   | 199,900   |
| Com_99_neg  | Vitexin-2-O-rhamnoside                      | C27H30O14        | 578.52 | 7.79  | 577.16 | Flavonoids                       | 7,038,000 | 780,900   | 645,300   | 7,923,000 | 7,532,000 | 7,762,000 | #####     | #####     | #####     |
| Com_95_neg  | Wogonin                                     | C16H12O5         | 284.26 | 9.89  | 283.06 | Flavonoids                       | 7,637     | 30,930    | 11,505    | 180,600   | 154,500   | 168,200   | 52,120    | 44,600    | 37,820    |
| Com_328_pos | Xanthine                                    | C5H4N4O2         | 152.11 | 0.79  | 153.04 | Nucleotide And Its Derivates     | 378,100   | 415,600   | 574,900   | 157,000   | 142,500   | 140,300   | 350,200   | 316,000   | 312,000   |
| Com_96_neg  | Xanthosine                                  | C10H12N4O6       | 284.23 | 1.16  | 283.07 | Nucleotide And Its Derivates     | 271,700   | 178,800   | 136,700   | 29,980    | 30,160    | 60,620    | 95,470    | 68,040    | 52,080    |
| Com_56_neg  | Xanthurenic acid                            | C10H7NO4         | 205.17 | 2.36  | 204.03 | Organic Acid And Its Derivatives | 61,250    | 25,910    | 16,080    | 14,790    | 10,670    | 16,430    | 685,500   | 612,800   | 380,100   |
| Com_545_pos | Xanthurenic acid O-hexoside                 | C16H17NO9        | 367.31 | 1.59  | 368.10 | Amino Acid And Its Derivatives   | 1,059,000 | 719,800   | 641,500   | 687,600   | 609,500   | 558,000   | 1,103,000 | 1,143,000 | 1,223,000 |
| Com_227_neg | Ziyuglycoside II                            | C35H56O8         | 604.81 | 14.57 | 603.39 | Others                           | 10,690    | 7,982     | 7,086     | 8,794     | 7,846     | 8,419     | 2,417     | 2,508     | 2,773     |
| Com_226_neg | $\alpha$ -Benzylsuccinic acid               | C11H12O4         | 208.21 | 0.93  | 189.06 | Organic Acid And Its Derivatives | 77,870    | 46,460    | 46,390    | 43,260    | 68,830    | 44,600    | 75,810    | 67,670    | 77,170    |
| Com_509_pos | $\alpha$ -Nicotinamide adenine dinucleotide | C21H27N7O14P2    | 663.43 | 0.72  | 664.12 | Nucleotide And Its Derivates     | 8,371     | 174,900   | 172,700   | 74,420    | 59,500    | 40,230    | 36,360    | 38,550    | 29,480    |

|             |                                                |            |        |      |        |                                   |         |         |         |         |         |         |         |         |         |
|-------------|------------------------------------------------|------------|--------|------|--------|-----------------------------------|---------|---------|---------|---------|---------|---------|---------|---------|---------|
| Com_595_pos | β-Alanine                                      | C3H7NO2    | 89.09  | 0.66 | 90.00  | Amino Acid And<br>Its Derivatives | 515,300 | 152,000 | 206,800 | 385,500 | 546,400 | 571,100 | 812,600 | 368,500 | 546,700 |
| Com_220_neg | p-D-glucopyranosyl-cateic<br>γ,γ-Dimethylnonyl |            |        | 0.63 | 341.10 | Phenols                           | 922,700 | 413,900 | 329,500 | 114,600 | 130,400 | 95,710  | 247,100 | 238,700 | 147,200 |
| Com_106_neg | oxomethacabate                                 | C5H12O7P2  | 246.09 | 0.71 | 245.00 | Others                            | 140,600 | 81,600  | 131,300 | 49,300  | 45,620  | 67,690  | 135,300 | 117,800 | 161,700 |
| Com_466_pos | γ-Glu-Leu                                      | C11H20N2O5 | 260.29 | 2.91 | 261.15 | Amino Acid And<br>Its Derivatives | 141,200 | 375,600 | 198,700 | 26,560  | 21,790  | 24,060  | 267,800 | 297,600 | 284,400 |
| Com_467_pos | Γ-Glutamate-Cysteine                           | C8H14N2O5S | 250.27 | 0.77 | 251.07 | Amino Acid And<br>Its Derivatives | 457,800 | 65,390  | 38,260  | 197,600 | 169,300 | 183,300 | 116,200 | 123,100 | 143,800 |
| Com_468_pos | δ-Hexanolactone                                | C6H10O2    | 114.14 | 0.71 | 115.09 | Others                            | 438,200 | 277,100 | 231,700 | 700,400 | 627,200 | 595,800 | 412,300 | 473,400 | 437,400 |

<sup>1</sup> MW molecular weight. RT retention time. Q1 parent ion. QC quality control.
