# Supplementary material for: Revealing of Intracellular Antioxidants in Dendrobium nobile by High Performance Liquid Chromatography-Tandem Mass Spectrometry
Source: MDPI journal article supplement (doi:10.3390/metabo13060702), 2023-05-28
Supplement: s1 [file s1]

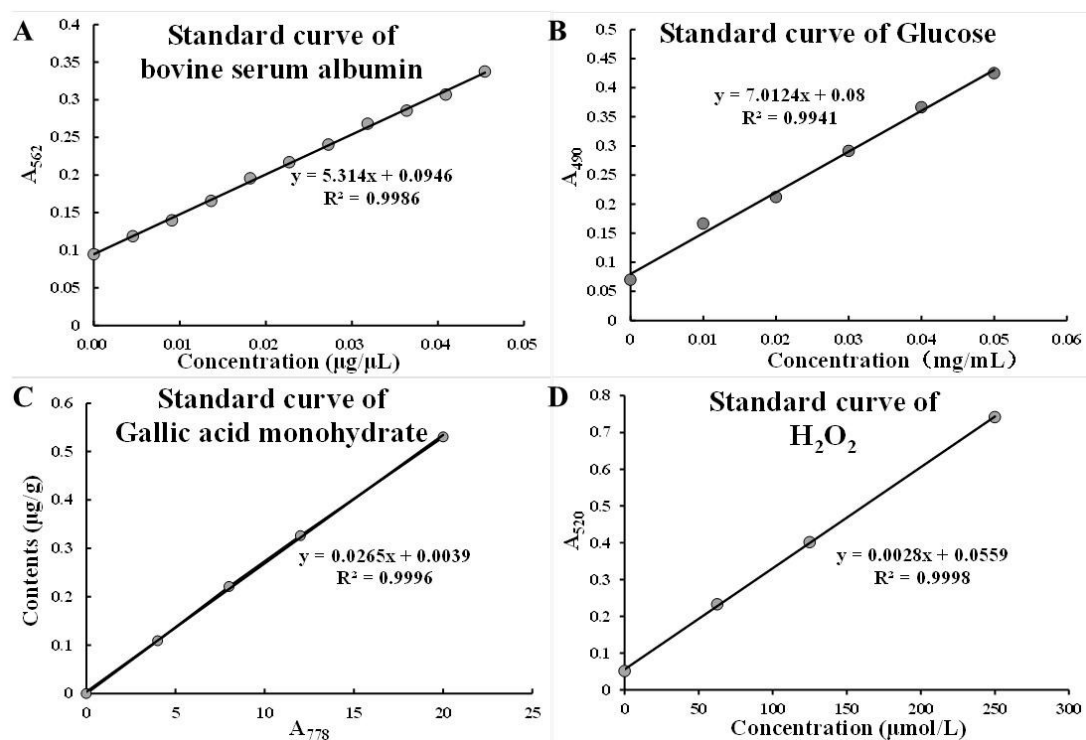

**Figure S2** Standard curves used for quantification of total proteins, total soluble saccharides, total phenols, and CAT activities. A Standard curve of bovine serum albumin. B Standard curve of glucose. C Standard curve of gallic acid monohydrate. D Standard curve of  $\text{H}_2\text{O}_2$ .
