# Supplementary figures and images for: Revealing of Intracellular Antioxidants in Dendrobium nobile by High Performance Liquid Chromatography-Tandem Mass Spectrometry
Source: MDPI journal article supplement (doi:10.3390/metabo13060702), 2023-05-28

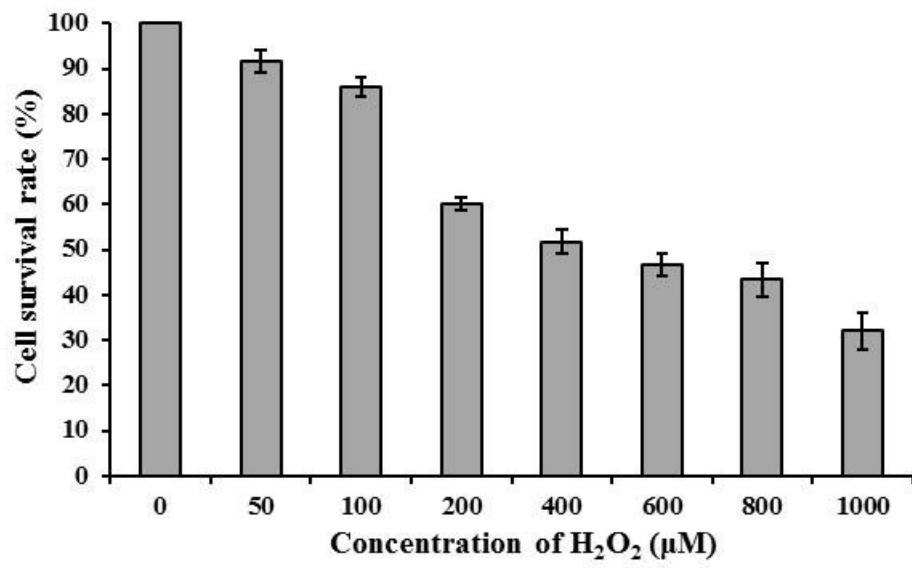

**Fig S1** The survival rates of H293T cells under different concentrations of H<sub>2</sub>O<sub>2</sub>.

Supplement: s1 [file s1]
